# Supplementary material for: Diversity in Protein Glycosylation among Insect Species
Source: PubMed Central journal article supplement (PMC3044136; doi:10.1371/journal.pone.0016682), 2011-02-23
Supplement: pone.0016682.s004.pdf [file pone.0016682.s004.pdf]

**Table S1:** Annotation of the identified glycoproteins for *Tribolium castaneum*. The list contains the accession number from Beetlebase, an abundance index (emPAI index) and the putative number of N-glycosylation sites.

| <b>Protein ID</b> | <b>Protein description</b>                | <b>emPAI</b> | <b>putative N-glycosylation sites</b> |
|-------------------|-------------------------------------------|--------------|---------------------------------------|
| TC015322          | ATP SYNTHASE BETA SUBUNIT                 | 4,0548       | 1                                     |
| TC002985          | 60S RIBOSOMAL PROTEIN L36E                | 3,6419       | 0                                     |
| TC013596          | ARGININE KINASE                           | 3,217        | 0                                     |
| TC015373          | ApoLp-III                                 | 1,7823       | 1                                     |
| TC013602          | VITELLOGENIN-RELATED                      | 1,6736       | 5                                     |
| TC003326          | ACTIN                                     | 1,6369       | 1                                     |
| TC010839          | VITELLOGENIN-RELATED                      | 1,4288       | 7                                     |
| TC003967          | 60S RIBOSOMAL PROTEIN L14                 | 1,3714       | 1                                     |
| TC003672          | 60S RIBOSOMAL PROTEIN L18                 | 1,1543       | 0                                     |
| TC005376          | INSECT HEMOCYANIN-RELATED                 | 1,1543       | 3                                     |
| TC013536          | 60S RIBOSOMAL PROTEIN L17                 | 1,1543       | 0                                     |
| TC007793          | HEAT SHOCK PROTEIN 70KDA                  | 1,0059       | 4                                     |
| TC014757          | 40S RIBOSOMAL PROTEIN S8                  | 0,9953       | 1                                     |
| TC010002          | 60S RIBOSOMAL PROTEIN L12                 | 0,9306       | 2                                     |
| TC015161          | SHORT-CHAIN DEHYDROGENASE-RELATED         | 0,8737       | 0                                     |
| TC015029-GA       | ZINC FINGER PROTEIN GLIS3                 | 0,8548       | 0                                     |
| TC008728          | ATP SYNTHASE ALPHA SUBUNIT MITOCHONDRIAL  | 0,848        | 1                                     |
| TC014154          | INTER-ALPHA-TRYPSIN INHIBITOR HEAVY CHAIN | 0,7783       | 10                                    |
| TC000476          | FERRITIN SUBUNIT 1, INSECT                | 0,6379       | 1                                     |
| TC002464          | ALPHA-MANNOSIDASE                         | 0,6125       | 7                                     |
| TC006769          | INSECT HEMOCYANIN-RELATED                 | 0,6066       | 3                                     |
| TC001671          | 60S RIBOSOMAL PROTEIN L27E                | 0,5849       | 0                                     |
| TC002951          | 60S RIBOSOMAL PROTEIN L7                  | 0,5849       | 0                                     |
| TC005374          | INSECT HEMOCYANIN-RELATED                 | 0,4873       | 2                                     |

|             |                                                  |        |   |
|-------------|--------------------------------------------------|--------|---|
| TC005233    | MALIC ENZYME-RELATED                             | 0,4839 | 4 |
| TC000084-GA | CATALASE                                         | 0,4679 | 2 |
| TC000180    | 60S RIBOSOMAL PROTEIN L24                        | 0,4679 | 0 |
| TC002098    | 60S RIBOSOMAL PROTEIN L35A                       | 0,4679 | 1 |
| TC003739    | HISTONE H1/H5                                    | 0,4679 | 1 |
| TC009596    | CYTOCHROME C OXIDASE                             | 0,4679 | 0 |
| TC013931    | ATP SYNTHASE DELTA CHAIN, MITOCHONDRIAL          | 0,4679 | 0 |
| TC014183    | 60S RIBOSOMAL PROTEIN L13                        | 0,4679 | 1 |
| TC008407    | SUSHI DOMAIN CONTAINING PROTEIN                  | 0,425  | 9 |
| TC005792    | 60S RIBOSOMAL PROTEIN L11                        | 0,3896 | 1 |
| TC006106    | 60S RIBOSOMAL PROTEIN L32                        | 0,3896 | 0 |
| TC013168    | 60S RIBOSOMAL PROTEIN L4                         | 0,3896 | 1 |
| TC015013    | 60S ACIDIC RIBOSOMAL PROTEIN P2                  | 0,3896 | 0 |
| TC016306    | 60S ACIDIC RIBOSOMAL PROTEIN P0                  | 0,3896 | 0 |
| TC008358    | ALPHA-AMYLASE                                    | 0,3459 | 3 |
| TC009485    | 60S RIBOSOMAL PROTEIN L23                        | 0,3335 | 1 |
| TC012980    | ALANINE AMINOTRANSFERASE                         | 0,3335 | 0 |
| TC006170    | GLYCERALDEHYDE 3-PHOSPHATE DEHYDROGENASE         | 0,311  | 2 |
| TC011300    | FASCICLIN I                                      | 0,311  | 2 |
| TC015170    | 3-HYDROXYACYL-COA DEHYDROGENASE                  | 0,311  | 2 |
| TC015539    | Ribosomal_S3Ae                                   | 0,311  | 1 |
| TC005232    | MALIC ENZYME                                     | 0,3011 | 4 |
| TC001152    | HEAT SHOCK PROTEIN 30                            | 0,2915 | 1 |
| TC002692    | SERINE PROTEASE FAMILY S10 SERINE CARBOXYPEPTIDA | 0,2915 | 5 |
| TC005377    | INSECT HEMOCYANIN-RELATED                        | 0,2744 | 3 |
| TC004789    | TRANSKETOLASE                                    | 0,2589 | 0 |
| TC008357    | ALPHA-AMYLASE                                    | 0,2589 | 2 |
| TC030080    | SERINE PROTEASE INHIBITOR, SERPIN                | 0,2589 | 0 |

|          |                                               |        |    |
|----------|-----------------------------------------------|--------|----|
| TC000083 | CATALASE                                      | 0,2328 | 1  |
| TC003323 | UBIQUINOL-CYTOCHROME C REDUCTASE COMPLEX COR  | 0,2328 | 6  |
| TC003496 | GLUTATHIONE S-TRANSFERASE                     | 0,2328 | 0  |
| TC010958 | UNCHARACTERIZED                               | 0,2328 | 1  |
| TC013214 | CITRATE SYNTHASE                              | 0,2328 | 2  |
| TC030666 | 60S RIBOSOMAL PROTEIN L6                      | 0,2328 | 0  |
| TC007894 | ALPHA-ACTININ                                 | 0,2196 | 0  |
| TC004868 | PROTEASOME SUBUNIT ALPHA TYPE 2               | 0,2114 | 0  |
| TC004921 | CREG1 PROTEIN                                 | 0,2114 | 2  |
| TC006550 | RIBOSOMAL PROTEIN S2                          | 0,2114 | 1  |
| TC008354 | V-TYPE ATP SYNTHASE ALPHA CHAIN               | 0,2114 | 3  |
| TC008584 | PROTEASE FAMILY M28 PLASMA GLUTAMATE CARBOXYF | 0,2114 | 4  |
| TC009602 | SERINE PROTEASE-RELATED, INSECT               | 0,2114 | 1  |
| TC014574 | PROTEASOME SUBUNIT ALPHA TYPE 7               | 0,2114 | 1  |
| TC014929 | PEROXIREDOXIN                                 | 0,2114 | 0  |
| TC000378 | LEUCINE AMINOPEPTIDASE                        | 0,2023 | 0  |
| TC007349 | ARYLSULFATASE B                               | 0,2023 | 4  |
| TC008246 | GLYCOGEN PHOSPHORYLASE                        | 0,2023 | 5  |
| TC012423 | IMMUNOGLOBULIN DOMAIN SUPERFAMILY (SENSORY G  | 0,1937 | 4  |
| TC014907 | INSECT HEMOCYANIN-RELATED                     | 0,1937 | 2  |
| TC010489 | MULTICOPPER OXIDASE                           | 0,186  | 1  |
| TC005395 | RIBOSOMAL PROTEIN L3P                         | 0,1787 | 0  |
| TC008261 | 40S RIBOSOMAL PROTEIN S3                      | 0,1787 | 1  |
| TC008275 | LEUCINE-RICH TRANSMEMBRANE PROTEINS           | 0,1787 | 3  |
| TC008684 | 15-HYDROXYPROSTAGLANDIN DEHYDROGENASE         | 0,166  | 2  |
| TC001209 | FRUCTOSE-1,6-BISPHOSPHATASE-RELATED           | 0,1548 | 1  |
| TC001976 | LEUCINE-RICH TRANSMEMBRANE PROTEINS           | 0,1548 | 11 |
| TC004566 | INORGANIC PYROPHOSPHATASE                     | 0,1548 | 1  |

|          |                                                |        |    |
|----------|------------------------------------------------|--------|----|
| TC009010 | ATP SYNTHASE GAMMA SUBUNIT 1                   | 0,1548 | 2  |
| TC010956 | REVERSE TRANSCRIPTASE                          | 0,1513 | 4  |
| TC011877 | UNCHARACTERIZED                                | 0,145  | 5  |
| TC015655 | PUR-TRANSCRIPTIONAL ACTIVATOR                  | 0,145  | 1  |
| TC006139 | MULTIPLE INOSITOL POLYPHOSPHATE PHOSPHATASE    | 0,1421 | 4  |
| TC005367 | HOMOGENTISATE 1,2-DIOXYGENASE                  | 0,1366 | 2  |
| TC008729 | ACETYL-COA C-ACYLTRANSFERASE                   | 0,1366 | 2  |
| TC011159 | PYRUVATE DEHYDROGENASE E1 COMPONENT, BETA SUB  | 0,1366 | 0  |
| TC013570 | CADHERIN                                       | 0,1345 | 10 |
| TC004989 | CATHEPSIN D                                    | 0,1288 | 2  |
| TC005725 | ACONITASE                                      | 0,1288 | 2  |
| TC007948 | LEUCINE-RICH TRANSMEMBRANE PROTEIN             | 0,1288 | 4  |
| TC001880 | ELONGATION FACTOR 1-ALPHA (EF-1-ALPHA)         | 0,122  | 1  |
| TC004723 | PROTEIN DISULFIDE ISOMERASE                    | 0,122  | 0  |
| TC005597 | DIHYDROLIPOAMIDE ACETYL/SUCCINYL-TRANSFERASE-R | 0,122  | 0  |
| TC007186 | LYSOSOMAL ACID LIPASE-RELATED                  | 0,122  | 1  |
| TC015428 | ACYL-COA DEHYDROGENASE                         | 0,122  | 2  |
| TC002247 | SERINE PROTEASE INHIBITOR, SERPIN              | 0,1158 | 3  |
| TC004590 | 14-3-3 protein                                 | 0,1158 | 3  |
| TC011254 | SUCCINATE SEMIALDEHYDE DEHYDROGENASE           | 0,1158 | 1  |
| TC014998 | FRUCTOSE-BISPHOSPHATE ALDOLASE                 | 0,1158 | 0  |
| TC010540 | LAMININ GAMMA-1 CHAIN, INSECT                  | 0,113  | 9  |
| TC002547 | ELECTRON TRANSPORT OXIDOREDUCTASE              | 0,1105 | 2  |
| TC005741 | SERINE PROTEASE INHIBITOR, SERPIN              | 0,1105 | 3  |
| TC009325 | FUMARYLACETOACETATE HYDROLASE                  | 0,1105 | 3  |
| TC003450 | PROTEASE S28 PRO-X CARBOXYPEPTIDASE-RELATED    | 0,1054 | 2  |
| TC008778 | BETA-HEXOSAMINIDASE                            | 0,1054 | 5  |
| TC009636 | ALPHA-GALACTOSIDASE/ALPHA-N-ACETYLGALACTOSAM   | 0,1054 | 5  |

|          |                                                 |        |    |
|----------|-------------------------------------------------|--------|----|
| TC016225 | PURINE BIOSYNTHESIS PROTEIN 6, PUR6             | 0,1054 | 2  |
| TC006555 | HEPARAN N-SULFATASE                             | 0,1008 | 6  |
| TC007253 | FASCICLIN II (FAS II)                           | 0,1008 | 8  |
| TC010864 | UNCHARACTERIZED                                 | 0,1008 | 1  |
| TC011207 | ENOYL-COA HYDRATASE-RELATED                     | 0,1008 | 1  |
| TC012702 | 4-HYDROXYPHENYLPYRUVATE DIOXYGENASE             | 0,1008 | 0  |
| TC013056 | ASPARTATE AMMONIA LYASE                         | 0,1008 | 2  |
| TC003279 | ADENOSINE DEAMINASE                             | 0,0965 | 4  |
| TC003230 | COLLAGEN ALPHA CHAIN                            | 0,0927 | 16 |
| TC006189 | FAMILY NOT NAMED                                | 0,0927 | 4  |
| TC015266 | CARBOXYLESTERASE                                | 0,0927 | 2  |
| TC001751 | UDP-N-ACTEYLGLUCOSAMINE PYROPHOSPHORYLASE 1     | 0,0889 | 0  |
| TC002470 | QUIESCIN Q6-RELATED SULFHYDRYL OXIDASE          | 0,0889 | 5  |
| TC011039 | SPHINGOMYELIN PHOSPHODIESTERASE 1, 2            | 0,0889 | 3  |
| TC013193 | JUVENILE HORMONE ESTERASE                       | 0,0889 | 4  |
| TC030624 | 2-OXOGLUTARATE DEHYDROGENASE                    | 0,0874 | 3  |
| TC000170 | BETA-GALACTOSIDASE RELATED                      | 0,0857 | 9  |
| TC000188 | HEAT SHOCK PROTEIN 70 (HSP70)                   | 0,0857 | 5  |
| TC000960 | ALDEHYDE DEHYDROGENASE                          | 0,0857 | 1  |
| TC015046 | MITOCHONDRIAL PROCESSING PEPTIDASE BETA SUBUNIT | 0,0857 | 1  |
| TC007063 | UNCHARACTERIZED                                 | 0,0827 | 5  |
| TC015240 | ANGIOTENSIN-CONVERTING ENZYME                   | 0,0827 | 5  |
| TC015262 | Periplasmic binding protein-like II             | 0,0827 | 5  |
| TC004643 | VITELLOGENIN-RELATED                            | 0,0809 | 0  |
| TC000643 | CHAOPTIN                                        | 0,0797 | 8  |
| TC012795 | UNCHARACTERIZED                                 | 0,0797 | 5  |
| TC008043 | LOW DENSITY LIPOPROTEIN RECEPTOR                | 0,0784 | 9  |
| TC013632 | CONTACTIN, INSECT                               | 0,0784 | 9  |

|          |                                                |        |    |
|----------|------------------------------------------------|--------|----|
| TC002057 | GLUTAMATE DEHYDROGENASE                        | 0,0772 | 1  |
| TC011019 | TROPOMYOSIN INVERTEBRATE                       | 0,0747 | 4  |
| TC011905 | UNCHARACTERIZED                                | 0,0747 | 7  |
| TC015385 | ALDEHYDE DEHYDROGENASE PROTEIN 6               | 0,0723 | 4  |
| TC005375 | INSECT HEMOCYANIN-RELATED                      | 0,0681 | 2  |
| TC007868 | TBC1 DOMAIN FAMILY MEMBER GTPASE-ACTIVATING PF | 0,0681 | 3  |
| TC011024 | HEAT SHOCK PROTEIN 90                          | 0,0681 | 3  |
| TC014606 | HEAT SHOCK PROTEIN 90                          | 0,0681 | 3  |
| TC013741 | VITELLOGENIN-RELATED                           | 0,0661 | 4  |
| TC001355 | UNCHARACTERIZED                                | 0,0578 | 11 |
| TC003461 | LAMININ ALPHA CHAIN, INVERTEBRATE              | 0,0571 | 16 |
| TC005184 | LAMININ BETA CHAIN-RELATED                     | 0,0524 | 11 |
| TC013390 | PROCOLLAGEN/CELL ADHESION MOLECULE RELATED     | 0,0524 | 2  |
| TC002989 | ALPHA-L-FUCOSIDASE                             | 0,0512 | 5  |
| TC012185 | HEAT SHOCK PROTEIN 90                          | 0,0512 | 3  |
| TC000756 | LEUCINE-RICH TRANSMEMBRANE PROTEINS            | 0,0503 | 18 |
| TC003229 | UNCHARACTERIZED                                | 0,0491 | 19 |
| TC003460 | LAMININ ALPHA CHAIN, INVERTEBRATE              | 0,044  | 18 |
| TC001262 | ALANYL AMINOPEPTIDASE                          | 0,0435 | 7  |
| TC002089 | HEAT SHOCK PROTEIN 70 (HSP70)                  | 0,0428 | 11 |
| TC005994 | NEUROTRACTING                                  | 0,0385 | 14 |
| TC001889 | IMMUNOGLOBULIN DOMAIN SUPERFAMILY              | 0,0349 | 9  |
| TC014664 | UNCHARACTERIZED                                | 0,0299 | 10 |
| TC013545 | UDP-GLUCOSE GLYCOPROTEIN:GLUCOSYLTRANSFERASE   | 0,0268 | 2  |
| TC013894 | LOW-DENSITY LIPOPROTEIN RECEPTOR               | 0,0261 | 27 |

---
