# Supplementary material for: Diversity in Protein Glycosylation among Insect Species
Source: PubMed Central journal article supplement (PMC3044136; doi:10.1371/journal.pone.0016682), 2011-02-23
Supplement: pone.0016682.s005.pdf [file pone.0016682.s005.pdf]

**Table S2:** Annotation of the identified glycoproteins for *Bombyx mori*. The list contains the accession number from Silkbase, an abundance index (emPAI index) and the putative number of *N*-glycosylation sites.

| <b>Protein ID</b> | <b>Protein description</b>               | <b>emPAI</b> | <b>putative <i>N</i>-glycosylation sites</b> |
|-------------------|------------------------------------------|--------------|----------------------------------------------|
| BGIBMGA002186-PA  | PEROXIREDOXIN                            | 1,5119       | 0                                            |
| BGIBMGA010979-PA  | UNCHARACTERIZED                          | 0,9306       | 0                                            |
| BGIBMGA008768-PA  | FERRITIN SUBUNIT 1, INSECT               | 0,5849       | 1                                            |
| BGIBMGA004464-PA  | Lipoprotein_11                           | 0,5506       | 1                                            |
| BGIBMGA007183-PA  | SERINE PROTEASE-RELATED                  | 0,4679       | 0                                            |
| BGIBMGA009130-PA  | 40S RIBOSOMAL PROTEIN S20                | 0,3896       | 0                                            |
| BGIBMGA013157-PA  | 60S ACIDIC RIBOSOMAL PROTEIN P2          | 0,3896       | 0                                            |
| BGIBMGA012788-PA  | SERINE PROTEASE-RELATED, INSECT          | 0,3335       | 5                                            |
| BGIBMGA002103-PA  | TUBULIN ALPHA CHAIN                      | 0,3183       | 1                                            |
| BGIBMGA000353-PA  | GRAM-NEGATIVE BACTERIA BINDING PROTEIN 1 | 0,2915       | 1                                            |
| BGIBMGA001280-PA  | DEHYDRODOLICHYL DIPHOSPHATE SYNTHASE     | 0,2915       | 0                                            |
| BGIBMGA014404-PA  | SERINE PROTEASE-RELATED, INSECT          | 0,2744       | 1                                            |
| BGIBMGA010361-PA  | GLYCOGEN PHOSPHORYLASE                   | 0,2497       | 6                                            |
| BGIBMGA005576-PA  | ACTIN                                    | 0,2451       | 1                                            |
| BGIBMGA003323-PA  | UNCHARACTERIZED                          | 0,2328       | 0                                            |
| BGIBMGA005664-PA  | ALPHA,ALPHA-TREHALASE                    | 0,2328       | 5                                            |
| BGIBMGA013108-PA  | Apolipophorin-III                        | 0,2218       | 0                                            |
| BGIBMGA001043-PA  | 60S RIBOSOMAL PROTEIN L27A               | 0,2114       | 0                                            |
| BGIBMGA001201-PA  | CALPONIN/TRANSGELIN                      | 0,1937       | 1                                            |
| BGIBMGA001584-PA  | TROPOMYOSIN INVERTEBRATE                 | 0,1937       | 1                                            |
| BGIBMGA001320-PA  | SERINE PROTEASE-RELATED, INSECT          | 0,166        | 0                                            |
| BGIBMGA003322-PA  | JHBP                                     | 0,166        | 2                                            |
| BGIBMGA010400-PA  | LIPASE                                   | 0,166        | 1                                            |
| BGIBMGA014429-PA  | SERINE PROTEASE-RELATED, INSECT          | 0,166        | 0                                            |
| BGIBMGA011467-PA  | 60S RIBOSOMAL PROTEIN L18A               | 0,1548       | 1                                            |

|                  |                                         |        |   |
|------------------|-----------------------------------------|--------|---|
| BGIBMGA011844-PA | PROTEIN DISULFIDE ISOMERASE             | 0,1548 | 0 |
| BGIBMGA002604-PA | DUF3421                                 | 0,145  | 1 |
| BGIBMGA012831-PA | ALDO-KETO REDUCTASE                     | 0,145  | 1 |
| BGIBMGA002846-PA | PTD012 PROTEIN                          | 0,1288 | 2 |
| BGIBMGA007720-PA | SERINE PROTEASE INHIBITOR, SERPIN       | 0,1288 | 1 |
| BGIBMGA010867-PA | 30S/40S RIBOSOMAL PROTEIN S4            | 0,1288 | 1 |
| BGIBMGA013341-PA | MUCIN                                   | 0,122  | 0 |
| BGIBMGA009551-PA | SERINE PROTEASE-RELATED, INSECT         | 0,1158 | 2 |
| BGIBMGA010257-PA | SERINE PROTEASE-RELATED, INSECT         | 0,1054 | 1 |
| BGIBMGA013945-PA | ACTIN                                   | 0,1008 | 1 |
| BGIBMGA005696-PA | scrB_fam: sucrose-6-phosphate hydrolase | 0,0965 | 3 |
| BGIBMGA002818-PA | DISULFIDE OXIDOREDUCTASE                | 0,0927 | 2 |
| BGIBMGA009028-PA | INSECT HEMOCYANIN-RELATED               | 0,0889 | 2 |
| BGIBMGA013342-PA | MUCIN                                   | 0,0889 | 2 |
| BGIBMGA010812-PA | GLYCOSIDE HYDROLASES                    | 0,0857 | 1 |
| BGIBMGA014227-PA | MYOSIN                                  | 0,0847 | 2 |
| BGIBMGA001841-PA | CARBOXYLESTERASE                        | 0,0827 | 6 |
| BGIBMGA005240-PA | ALPHA-AMYLASE                           | 0,0827 | 1 |
| BGIBMGA008214-PA | ASPARTATE AMMONIA LYASE                 | 0,0827 | 2 |
| BGIBMGA009983-PA | RIBOSOME BIOGENESIS PROTEIN BRIX        | 0,0827 | 1 |
| BGIBMGA010876-PA | Lipoprotein_11                          | 0,0827 | 4 |
| BGIBMGA005493-PA | ENOLASE                                 | 0,0797 | 1 |
| BGIBMGA007728-PA | GLUTAMATE CARBOXYPEPTIDASE              | 0,0747 | 0 |
| BGIBMGA008164-PA | Lipoprotein_11                          | 0,0747 | 3 |
| BGIBMGA010536-PA | GLYCOSIDE HYDROLASES                    | 0,0747 | 3 |
| BGIBMGA002241-PA | V-TYPE ATP SYNTHASE BETA CHAIN          | 0,0723 | 3 |
| BGIBMGA008949-PA | FAMILY NOT NAMED                        | 0,0681 | 7 |
| BGIBMGA012221-PA | TRANSFERRIN                             | 0,0681 | 7 |
| BGIBMGA001853-PA | ATP SYNTHASE                            | 0,0607 | 1 |
| BGIBMGA002527-PA | ANGIOTENSIN-CONVERTING ENZYME           | 0,0593 | 4 |

|                  |                                              |        |    |
|------------------|----------------------------------------------|--------|----|
| BGIBMGA008295-PA | V-TYPE ATP SYNTHASE ALPHA CHAIN              | 0,0593 | 2  |
| BGIBMGA003788-PA | LONG-CHAIN-FATTY-ACID COA LIGASE             | 0,0578 | 1  |
| BGIBMGA008063-PA | ALANYL AMINOPEPTIDASE                        | 0,0471 | 16 |
| BGIBMGA009027-PA | INSECT HEMOCYANIN-RELATED                    | 0,0452 | 2  |
| BGIBMGA009463-PA | HOST CELL FACTOR-RELATED                     | 0,0404 | 3  |
| BGIBMGA008551-PA | HEAT SHOCK PROTEIN 70KDA                     | 0,0397 | 6  |
| BGIBMGA012240-PA | LAMININ                                      | 0,0359 | 10 |
| BGIBMGA014226-PA | MYOSIN                                       | 0,0335 | 9  |
| BGIBMGA007512-PA | UDP-GLUCOSE GLYCOPROTEIN:GLUCOSYLTRANSFERASE | 0,0297 | 0  |

---
