# Supplementary material for: Diversity in Protein Glycosylation among Insect Species
Source: PubMed Central journal article supplement (PMC3044136; doi:10.1371/journal.pone.0016682), 2011-02-23
Supplement: pone.0016682.s006.pdf [file pone.0016682.s006.pdf]

**Table S3:** Annotation of the identified glycoproteins for *Apis mellifera*. The list contains the accession number from Beebase, an abundance index (emPAI index) and the putative number of *N*-glycosylation sites.

| <b>Protein ID</b> | <b>Protein description</b>                  | <b>emPAI</b> | <b>putative <i>N</i>-glycosylation sites</b> |
|-------------------|---------------------------------------------|--------------|----------------------------------------------|
| GB19422-PA        | ISOCITRATE DEHYDROGENASE [NAD]              | 2,8309       | 0                                            |
| GB10973-PA        | ARGININE KINASE                             | 2,4554       | 0                                            |
| GB13596-PA        | ATP SYNTHASE BETA SUBUNIT                   | 1,7214       | 0                                            |
| GB10275-PA        | TUBULIN BETA CHAIN                          | 1,5119       | 2                                            |
| GB14791-PA        | ATP SYNTHASE                                | 1,4485       | 1                                            |
| GB11613-PA        | GLYCEROL-3-PHOSPHATE DEHYDROGENASE          | 1,1543       | 0                                            |
| GB11892-PA        | GLYCOGEN PHOSPHORYLASE                      | 0,9829       | 5                                            |
| GB12453-PA        | ACTIN                                       | 0,9683       | 1                                            |
| GB11299-PA        | 60S RIBOSOMAL PROTEIN L19                   | 0,7783       | 0                                            |
| GB12140-PA        | 40S RIBOSOMAL PROTEIN S18                   | 0,7783       | 0                                            |
| GB13741-PA        | 40S RIBOSOMAL PROTEIN S8                    | 0,7783       | 1                                            |
| GB18417-PA        | ATP SYNTHASE F CHAIN, MITOCHONDRIAL-RELATED | 0,7783       | 0                                            |
| GB19498-PA        | UBIQUITIN-CONJUGATING ENZYME E2             | 0,7783       | 0                                            |
| GB10009-PA        | TUBULIN ALPHA CHAIN                         | 0,6237       | 2                                            |
| GB10913-PA        | 40S RIBOSOMAL PROTEIN S17                   | 0,5849       | 0                                            |
| GB15291-PA        | ATP SYNTHASE GAMMA SUBUNIT 1                | 0,5849       | 2                                            |
| GB17629-PA        | 60S RIBOSOMAL PROTEIN L8                    | 0,5849       | 0                                            |
| GB11028-PA        | SPECTRIN-LIKE CELL STRUCTURE PROTEIN        | 0,5346       | 0                                            |
| GB15079-PA        | GLUTAMATE DEHYDROGENASE                     | 0,5198       | 1                                            |
| GB19082-PA        | RIBOSOMAL PROTEIN S2                        | 0,5198       | 0                                            |
| GB12614-PA        | ACTIN                                       | 0,5014       | 1                                            |
| GB15619-PA        | TRANSKETOLASE                               | 0,4925       | 0                                            |
| GB12855-PA        | 2-OXOGLUTARATE DEHYDROGENASE                | 0,4815       | 5                                            |
| GB13101-PA        | transmembrane_regions                       | 0,4679       | 0                                            |
| GB14138-PA        | GLUTATHIONE PEROXIDASE                      | 0,4679       | 1                                            |
| GB16882-PA        | ELECTRON TRANSPORT OXIDOREDUCTASE           | 0,4679       | 1                                            |

|            |                                                   |        |   |
|------------|---------------------------------------------------|--------|---|
| GB17499-PA | MITOCHONDRIAL CARRIER PROTEIN RELATED             | 0,4679 | 0 |
| GB17238-PA | PYRUVATE DEHYDROGENASE E1 COMPONENT, BETA SUBUNIT | 0,425  | 1 |
| GB18647-PA | PROHIBITIN                                        | 0,425  | 2 |
| GB17876-PA | CATION-TRANSPORTING ATPASE                        | 0,4174 | 3 |
| GB10989-PA | V-TYPE ATP SYNTHASE ALPHA CHAIN                   | 0,4064 | 3 |
| GB15049-PA | GLUTAMATE SEMIALDEHYDE DEHYDROGENASE              | 0,3896 | 4 |
| GB18619-PA | 40S RIBOSOMAL PROTEIN S6                          | 0,3896 | 3 |
| GB19391-PA | SECRETED SUGAR HYDROLASE                          | 0,3896 | 0 |
| GB13536-PA | SUCCINYL-COA SYNTHETASE BETA CHAIN                | 0,3593 | 4 |
| GB20014-PA | GLYCEROL-3-PHOSPHATE DEHYDROGENASE                | 0,3593 | 1 |
| GB17641-PA | ALANINE AMINOTRANSFERASE                          | 0,3502 | 1 |
| GB10675-PA | ADP-RIBOSYLATION FACTOR, ARF                      | 0,3335 | 1 |
| GB14758-PA | HEAT SHOCK PROTEIN 90                             | 0,3335 | 3 |
| GB19724-PA | EUKARYOTIC INITIATION FACTOR 4A                   | 0,3335 | 1 |
| GB13368-PA | 3-HYDROXYACYL-COA DEHYDROGENASE                   | 0,311  | 0 |
| GB10514-PA | TUBULIN ALPHA CHAIN                               | 0,2915 | 1 |
| GB19208-PA | GTP-BINDING PROTEIN SAR1                          | 0,2915 | 0 |
| GB20114-PA | RIBOSOMAL PROTEIN L5-RELATED                      | 0,2915 | 0 |
| GB12573-PA | CITRATE SYNTHASE                                  | 0,2744 | 2 |
| GB12797-PA | TREHALOSE-6-PHOSPHATE SYNTHASE                    | 0,2688 | 3 |
| GB12338-PA | 60S ACIDIC RIBOSOMAL PROTEIN P0                   | 0,2589 | 0 |
| GB14798-PA | GLYCERALDEHYDE 3-PHOSPHATE DEHYDROGENASE          | 0,2589 | 2 |
| GB19380-PA | PEROXIREDOXIN                                     | 0,2589 | 0 |
| GB17113-PA | PHOSPHOFRUCTOKINASE                               | 0,2497 | 1 |
| GB10590-PA | PHOSPHATIDYLINOSITOL TRANSFER PROTEIN             | 0,2328 | 0 |
| GB12951-PA | 14-3-3 protein                                    | 0,2328 | 3 |
| GB15355-PA | NADH-UBIQUINONE OXIDOREDUCTASE-RELATED            | 0,2328 | 1 |
| GB17038-PA | NADH-UBIQUINONE OXIDOREDUCTASE 24 KDA SUBUNIT     | 0,2328 | 0 |
| GB10732-PA | HEAT SHOCK PROTEIN 70KDA                          | 0,2181 | 8 |
| GB12113-PA | VOLTAGE-DEPENDENT ANION-SELECTIVE CHANNEL         | 0,2114 | 5 |
| GB14832-PA | SUCCINATE DEHYDROGENASE IRON-SULFUR PROTEIN       | 0,2114 | 2 |
| GB18719-PA | ALCOHOL DEHYDROGENASE RELATED                     | 0,2114 | 1 |

|            |                                                          |        |    |
|------------|----------------------------------------------------------|--------|----|
| GB10560-PA | ELONGATION FACTOR 1-ALPHA                                | 0,1937 | 0  |
| GB16473-PA | 60S RIBOSOMAL PROTEIN L11                                | 0,1937 | 5  |
| GB16579-PA | ELECTRON TRANSPORT OXIDOREDUCTASE                        | 0,1937 | 2  |
| GB16742-PA | SARCALUMENIN                                             | 0,1937 | 0  |
| GB11076-PA | RECEPTOR FOR ACTIVATED PROTEIN KINASE C (RACK1)          | 0,1787 | 2  |
| GB11385-PA | MITOCHONDRIAL PROCESSING PEPTIDASE BETA SUBUNIT          | 0,1787 | 0  |
| GB15172-PA | ASPARTATE AMMONIA LYASE                                  | 0,1787 | 3  |
| GB16464-PA | MALATE AND LACTATE DEHYDROGENASE                         | 0,1787 | 4  |
| GB16903-PA | CATHEPSIN D                                              | 0,1787 | 1  |
| GB19885-PA | PYRUVATE CARBOXYLASE                                     | 0,17   | 1  |
| GB12182-PA | ACETYL-COA C-ACYLTRANSFERASE                             | 0,166  | 1  |
| GB16619-PA | NEPRILYSIN                                               | 0,166  | 10 |
| GB11273-PA | RETINOID-INDUCIBLE SERINE CARBOXYPEPTIDASE               | 0,1548 | 2  |
| GB11563-PA | MACROGLOBULIN/COMPLEMENT                                 | 0,145  | 1  |
| GB12341-PA | NUCLEAR PROTEIN SKIP-RELATED                             | 0,145  | 0  |
| GB12383-PA | KETOACID-COENZYME A TRANSFERASE                          | 0,145  | 2  |
| GB13613-PA | INSECT HEMOCYANIN-RELATED                                | 0,145  | 2  |
| GB16886-PA | PHOSPHATIDYLCHOLINE-STEROL ACYLTRANSFERASE-RELATED       | 0,145  | 3  |
| GB11056-PA | PHOSPHOGLYCERATE KINASE                                  | 0,1366 | 2  |
| GB16443-PA | PYRUVATE DEHYDROGENASE E1 COMPONENT, ALPHA SUBUNIT       | 0,1366 | 1  |
| GB19864-PA | CDP-DIACYLGLYCEROL-GLYCEROL-3-PHOSPHATE 3-PHOSPHATIDYLTR | 0,1366 | 0  |
| GB10122-PA | TUBULIN BETA CHAIN                                       | 0,122  | 2  |
| GB14747-PA | HEPARAN N-SULFATASE                                      | 0,122  | 4  |
| GB16600-PA | BETA-HEXOSAMINIDASE                                      | 0,122  | 3  |
| GB18969-PA | CHAPERONIN                                               | 0,122  | 2  |
| GB11973-PA | CYTOCHROME P450 SUBFAMILY 4G                             | 0,1158 | 1  |
| GB19171-PA | V-TYPE ATP SYNTHASE BETA CHAIN                           | 0,1158 | 3  |
| GB20080-PA | CHAPERONIN                                               | 0,1105 | 2  |
| GB11810-PA | CONTACTIN, INSECT                                        | 0,1054 | 9  |
| GB16316-PA | ALPHA,ALPHA-TREHALASE                                    | 0,1054 | 6  |
| GB11380-PA | VACUOLAR ATP SYNTHASE SUBUNIT C                          | 0,1008 | 4  |
| GB15016-PA | HEAT SHOCK PROTEIN 70 (HSP70)                            | 0,1008 | 0  |

|            |                                                   |        |    |
|------------|---------------------------------------------------|--------|----|
| GB10696-PA | DIHYDROPYRIDINE-SENSITIVE L-TYPE CALCIUM CHANNEL  | 0,0985 | 13 |
| GB14947-PA | RIBOPHORIN I                                      | 0,0965 | 3  |
| GB10140-PA | ENOLASE-PHOSPHATASE E-1                           | 0,0927 | 10 |
| GB14852-PA | HEAT SHOCK PROTEIN 70 (HSP70)                     | 0,0927 | 6  |
| GB20070-PA | ALPHA-AMYLASE                                     | 0,0927 | 11 |
| GB16429-PA | GLUCOSE-6-PHOSPHATE ISOMERASE                     | 0,0889 | 4  |
| GB12488-PA | ACONITASE, MITOCHONDRIAL                          | 0,0857 | 2  |
| GB12693-PA | SOLUTE CARRIER FAMILY 27 (FATTY ACID TRANSPORTER) | 0,0857 | 4  |
| GB13865-PA | PLASMA MEMBRANE CA-ATPASE B2                      | 0,0857 | 4  |
| GB14361-PA | INSECT HEMOCYANIN-RELATED                         | 0,0827 | 1  |
| GB14520-PA | FASCICLIN II (FAS II)                             | 0,0747 | 6  |
| GB13772-PA | PUROMYCIN-SENSITIVE AMINOPEPTIDASE                | 0,0681 | 2  |
| GB20055-PA | CATION-TRANSPORTING ATPASE                        | 0,0593 | 4  |
| GB18010-PA | NITRIC OXIDE SYNTHASE                             | 0,0551 | 6  |
| GB10992-PA | ATP-CITRATE SYNTHASE                              | 0,0537 | 7  |
| GB18372-PA | GLYCOGEN DEBRANCHING ENZYME                       | 0,0428 | 4  |
| GB14634-PA | BETA-HEXOSAMINIDASE                               | 0,0404 | 12 |
| GB17753-PA | ALANYL AMINOPEPTIDASE                             | 0,0402 | 20 |
| GB17989-PA | CADHERIN                                          | 0,0378 | 14 |
| GB11059-PA | MUCIN                                             | 0,0347 | 2  |
| GB17654-PA | TRANSMEMBRANE PROTEASE, SERINE 2                  | 0,0344 | 18 |
| GB18332-PA | UNCHARACTERIZED                                   | 0,032  | 7  |
| GB15133-PA | FAMILY NOT NAMED                                  | 0,0271 | 15 |
| GB12775-PA | LOW-DENSITY LIPOPROTEIN RECEPTOR (LDL)            | 0,0132 | 37 |
| GB15664-PA | SPECTRIN BETA CHAIN                               | 0,0132 | 18 |
| GB17035-PA | MUCIN                                             | 0,013  | 37 |

---
