# Supplementary material for: Diversity in Protein Glycosylation among Insect Species
Source: PubMed Central journal article supplement (PMC3044136; doi:10.1371/journal.pone.0016682), 2011-02-23
Supplement: pone.0016682.s007.pdf [file pone.0016682.s007.pdf]

**Table S4:** Annotation of the identified glycoproteins for *Drosophila melanogaster*. The list contains the accession number from Flybase, an abundance index (emPAI index) and the putative number of *N*-glycosylation sites.

| <b>Protein ID</b> | <b>Protein description</b>                         | <b>emPAI</b> | <b>putative <i>N</i>-glycosylation sites</b> |
|-------------------|----------------------------------------------------|--------------|----------------------------------------------|
| FBpp0071495       | PLC-like phosphodiesterases                        | 2,1623       | 9                                            |
| FBpp0088250       | ATP SYNTHASE BETA SUBUNIT                          | 2,02         | 0                                            |
| FBpp0079150       | C-TYPE LECTIN DOMAIN CONTAINING PROTEIN            | 1,6104       | 3                                            |
| FBpp0085139       | CHAOPTIN                                           | 1,3313       | 12                                           |
| FBpp0072365       | INSECT HEMOCYANIN-RELATED                          | 1,3099       | 1                                            |
| FBpp0080795       | MACROGLOBULIN/COMPLEMENT                           | 1,2387       | 12                                           |
| FBpp0070150       | 60S RIBOSOMAL PROTEIN L36E                         | 1,1543       | 0                                            |
| FBpp0289245       | UNCHARACTERIZED                                    | 0,8737       | 3                                            |
| FBpp0076111       | LAMININ                                            | 0,8647       | 9                                            |
| FBpp0076722       | LAMININ ALPHA CHAIN, INVERTEBRATE                  | 0,8412       | 19                                           |
| FBpp0079415       | C-TYPE LECTIN DOMAIN CONTAINING PROTEIN            | 0,7783       | 2                                            |
| FBpp0076270       | ARGININE KINASE                                    | 0,7014       | 0                                            |
| FBpp0074612       | SERINE PROTEASE INHIBITOR, SERPIN                  | 0,6877       | 2                                            |
| FBpp0079133       | MACROGLOBULIN/COMPLEMENT                           | 0,6066       | 7                                            |
| FBpp0071846       | 40S RIBOSOMAL PROTEIN S24                          | 0,5849       | 1                                            |
| FBpp0080043       | PROKAR_LIPOPROTEIN                                 | 0,5849       | 5                                            |
| FBpp0080214       | SERINE PROTEASE-RELATED, INSECT                    | 0,5849       | 1                                            |
| FBpp0080723       | RIBOSOMAL PROTEIN L30                              | 0,5849       | 0                                            |
| FBpp0081062       | TUBULIN ALPHA CHAIN                                | 0,5198       | 1                                            |
| FBpp0079113       | LAMININ BETA-1 CHAIN, INSECT                       | 0,4815       | 9                                            |
| FBpp0070940       | Ribosomal protein L22                              | 0,4679       | 0                                            |
| FBpp0075508       | CYSTEINE PROTEASE FAMILY C1-RELATED                | 0,4679       | 4                                            |
| FBpp0075735       | CARBOXYLESTERASE-6                                 | 0,4679       | 4                                            |
| FBpp0288658       | Crustacean CHH/MIH/GIH neurohormone                | 0,4679       | 2                                            |
| FBpp0082643       | VITELLOGENIN-RELATED                               | 0,4405       | 11                                           |
| FBpp0083269       | SERINE PROTEASE FAMILY S10 SERINE CARBOXYPEPTIDASE | 0,4125       | 0                                            |
| FBpp0072083       | Ribosomal_L11                                      | 0,3896       | 0                                            |
| FBpp0076359       | 60S RIBOSOMAL PROTEIN L14                          | 0,3896       | 0                                            |
| FBpp0071525       | GLYCOGEN DEBRANCHING ENZYME                        | 0,3769       | 5                                            |
| FBpp0072177       | TUBULIN BETA CHAIN                                 | 0,369        | 3                                            |
| FBpp0081524       | TUBULIN BETA CHAIN                                 | 0,369        | 2                                            |
| FBpp0070172       | UNCHARACTERIZED                                    | 0,3593       | 3                                            |
| FBpp0070190       | UNCHARACTERIZED                                    | 0,3593       | 3                                            |
| FBpp0086905       | DUF3421                                            | 0,3593       | 0                                            |

|             |                                                     |        |    |
|-------------|-----------------------------------------------------|--------|----|
| FBpp0071154 | Fibronectin type III                                | 0,3406 | 6  |
| FBpp0074086 | 40S RIBOSOMAL PROTEIN S19                           | 0,3335 | 0  |
| FBpp0085717 | Ribosomal_L5                                        | 0,3335 | 1  |
| FBpp0083802 | 40S RIBOSOMAL PROTEIN S3                            | 0,311  | 1  |
| FBpp0077115 | CELL ADHESION MOLECULE                              | 0,3011 | 9  |
| FBpp0077646 | FAMILY NOT NAMED                                    | 0,3011 | 2  |
| FBpp0088252 | MUCIN                                               | 0,2978 | 4  |
| FBpp0072355 | UNCHARACTERIZED                                     | 0,2915 | 7  |
| FBpp0076602 | 60S RIBOSOMAL PROTEIN L18                           | 0,2915 | 0  |
| FBpp0079440 | VITELLOGENIN-RELATED                                | 0,2915 | 0  |
| FBpp0084617 | 60S RIBOSOMAL PROTEIN L4                            | 0,2744 | 0  |
| FBpp0082782 | PERIOSTIN-RELATED                                   | 0,2688 | 4  |
| FBpp0072973 | Ins_allergen_rp                                     | 0,2589 | 1  |
| FBpp0074923 | DUF3421                                             | 0,2589 | 2  |
| FBpp0076040 | CYSTEINE-RICH SECRETORY PROTEIN                     | 0,2589 | 7  |
| FBpp0076750 | SERINE PROTEASE-RELATED, INSECT                     | 0,2589 | 0  |
| FBpp0077479 | SERINE PROTEASE-RELATED, INSECT                     | 0,2589 | 3  |
| FBpp0079653 | SERINE PROTEASE-RELATED, INSECT                     | 0,2589 | 1  |
| FBpp0081437 | SUCCINYL-COA SYNTHETASE BETA CHAIN                  | 0,2589 | 0  |
| FBpp0086315 | ALPHA-GALACTOSIDASE/ALPHA-N-ACETYLGALACTOSAMINIDASE | 0,2589 | 2  |
| FBpp0099686 | 40S RIBOSOMAL PROTEIN S8                            | 0,2589 | 1  |
| FBpp0078557 | CONTACTIN, INSECT                                   | 0,2549 | 10 |
| FBpp0087506 | PHOSPHOFRUCTOKINASE                                 | 0,252  | 2  |
| FBpp0070633 | Fibronectin type III                                | 0,2388 | 7  |
| FBpp0071075 | UNCHARACTERIZED                                     | 0,2328 | 2  |
| FBpp0076335 | SERINE PROTEASE-RELATED, INSECT                     | 0,2328 | 0  |
| FBpp0077261 | PROKAR_LIPOPROTEIN                                  | 0,2328 | 3  |
| FBpp0078677 | RETICULON-RELATED                                   | 0,2328 | 0  |
| FBpp0079321 | C-TYPE LECTIN DOMAIN CONTAINING PROTEIN             | 0,2328 | 2  |
| FBpp0079500 | 40S RIBOSOMAL PROTEIN S2                            | 0,2328 | 0  |
| FBpp0078982 | CRUMBS(D.MELANOGASTER)-RELATED                      | 0,2274 | 23 |
| FBpp0077109 | Fibronectin type III                                | 0,2218 | 7  |
| FBpp0084630 | TUBULIN BETA CHAIN                                  | 0,2218 | 4  |
| FBpp0071185 | UNCHARACTERIZED                                     | 0,2114 | 5  |
| FBpp0078690 | SERINE PROTEASE-RELATED, INSECT                     | 0,2114 | 0  |
| FBpp0087559 | GALACTOSE-SPECIFIC C-TYPE LECTIN                    | 0,2114 | 1  |
| FBpp0088242 | 40S RIBOSOMAL PROTEIN S3A                           | 0,2114 | 1  |
| FBpp0100044 | ALPHA-L-FUCOSIDASE                                  | 0,2114 | 2  |
| FBpp0271712 | FIBRINOGEN-RELATED                                  | 0,2114 | 3  |
| FBpp0076608 | PROTEASE S28 PRO-X CARBOXYPEPTIDASE-RELATED         | 0,2023 | 3  |

|             |                                                |        |    |
|-------------|------------------------------------------------|--------|----|
| FBpp0071343 | Fibrinogen_C                                   | 0,1937 | 2  |
| FBpp0079320 | C-TYPE LECTIN DOMAIN CONTAINING PROTEIN        | 0,1937 | 1  |
| FBpp0083548 | THIOREDOXIN_2                                  | 0,1937 | 4  |
| FBpp0085928 | ZN/RING FINGER PROTEIN 2                       | 0,1937 | 3  |
| FBpp0071794 | ATP SYNTHASE ALPHA SUBUNIT MITOCHONDRIAL       | 0,186  | 0  |
| FBpp0085915 | RNA-BINDING PROTEIN                            | 0,1722 | 3  |
| FBpp0081114 | GLUCOSE DEHYDROGENASE                          | 0,166  | 3  |
| FBpp0083855 | UNCHARACTERIZED                                | 0,166  | 4  |
| FBpp0079297 | ANGIOTENSIN-CONVERTING ENZYME                  | 0,1601 | 4  |
| FBpp0074167 | LIPASE                                         | 0,1548 | 2  |
| FBpp0070041 | Protein kinase-like (PK-like)                  | 0,145  | 2  |
| FBpp0070890 | 26S PROTEASE REGULATORY SUBUNIT S10B           | 0,145  | 1  |
| FBpp0082494 | GLYCOGEN SYNTHASE                              | 0,145  | 1  |
| FBpp0112535 | SERINE PROTEASE-RELATED, INSECT                | 0,145  | 5  |
| FBpp0074549 | ISOCITRATE DEHYDROGENASE                       | 0,1366 | 0  |
| FBpp0077536 | ASPARTATE AMINOTRANSFERASE                     | 0,1366 | 1  |
| FBpp0070435 | LAMININ                                        | 0,1316 | 0  |
| FBpp0070787 | Actin-LIKE                                     | 0,1288 | 1  |
| FBpp0079187 | RECEPTOR FOR ACTIVATED PROTEIN KINASE C        | 0,1288 | 1  |
| FBpp0084275 | ISOCITRATE DEHYDROGENASE [NAD]                 | 0,122  | 0  |
| FBpp0080895 | PROLYLCARBOXYPEPTIDASE/PRCP                    | 0,1158 | 6  |
| FBpp0081110 | PROTEIN DISULFIDE ISOMERASE                    | 0,1158 | 4  |
| FBpp0079406 | ALDEHYDE DEHYDROGENASE                         | 0,1105 | 2  |
| FBpp0083524 | PROTEASE M1 ZINC METALLOPROTEASE               | 0,1076 | 10 |
| FBpp0079101 | Terpenoid cyclases/Protein prenlyltransferases | 0,1054 | 8  |
| FBpp0071733 | CELL ADHESION MOLECULE                         | 0,1008 | 3  |
| FBpp0078603 | BETA-MANNOSIDASE                               | 0,1008 | 10 |
| FBpp0083526 | ALANYL AMINOPEPTIDASE                          | 0,1008 | 12 |
| FBpp0079621 | ALPHA-MANNOSIDASE                              | 0,0985 | 4  |
| FBpp0076310 | GLYPICAN                                       | 0,0965 | 3  |
| FBpp0073263 | ACID PHOSPHATASE RELATED                       | 0,0927 | 5  |
| FBpp0082248 | ACETYLCHOLINESTERASE                           | 0,0889 | 3  |
| FBpp0080129 | ANGIOTENSIN-CONVERTING ENZYME                  | 0,0857 | 3  |
| FBpp0085777 | BETA-GALACTOSIDASE                             | 0,0827 | 5  |
| FBpp0099974 | SERINE/THREONINE PROTEIN PHOSPHATASE           | 0,0827 | 1  |
| FBpp0071192 | BETA-HEXOSAMINIDASE                            | 0,0797 | 4  |
| FBpp0081089 | Fibronectin type III                           | 0,0797 | 11 |
| FBpp0073523 | ZINC METALLOPROTEASE                           | 0,0772 | 6  |
| FBpp0085736 | SUCCINATE DEHYDROGENASE 2 FLAVOPROTEIN SUBUNIT | 0,0747 | 0  |
| FBpp0077168 | NICOTINATE PHOSPHORIBOSYLTRANSFERASE           | 0,07   | 5  |

|             |                                                    |        |    |
|-------------|----------------------------------------------------|--------|----|
| FBpp0084624 | ZINC METALLOPROTEASE                               | 0,07   | 8  |
| FBpp0271723 | DOMON                                              | 0,0681 | 6  |
| FBpp0078531 | ZINC METALLOPROTEASE FAMILY M13 NEPRILYSIN-RELATED | 0,0661 | 8  |
| FBpp0079453 | 3-HYDROXYACYL-COA DEHYDROGENASE                    | 0,0661 | 1  |
| FBpp0076507 | LEUCINE-RICH TRANSMEMBRANE PROTEIN                 | 0,0641 | 10 |
| FBpp0082118 | Creatinase/aminopeptidase                          | 0,0641 | 3  |
| FBpp0084718 | ZINC METALLOPROTEASE                               | 0,0624 | 4  |
| FBpp0084772 | AMINOPEPTIDASE N-RELATED                           | 0,0624 | 5  |
| FBpp0084663 | BPTI_KUNITZ_2                                      | 0,0619 | 11 |
| FBpp0086050 | SEMAPHORIN                                         | 0,0607 | 6  |
| FBpp0081963 | MIDLINE FASCICLIN                                  | 0,0593 | 6  |
| FBpp0083401 | UNCHARACTERIZED                                    | 0,0551 | 11 |
| FBpp0084770 | AMINOPEPTIDASE N-RELATED                           | 0,0551 | 4  |
| FBpp0077121 | TREHALOSE-6-PHOSPHATE SYNTHASE                     | 0,0537 | 1  |
| FBpp0079632 | ALPHA-MANNOSIDASE                                  | 0,0537 | 9  |
| FBpp0073966 | Clathrin                                           | 0,0512 | 7  |
| FBpp0083523 | ALANYL AMINOPEPTIDASE                              | 0,0503 | 11 |
| FBpp0084767 | AMINOPEPTIDASE N-RELATED                           | 0,0481 | 4  |
| FBpp0075023 | 2-OXOGLUTARATE DEHYDROGENASE                       | 0,0471 | 3  |
| FBpp0077154 | Fibronectin type III                               | 0,0471 | 6  |
| FBpp0071853 | EGF                                                | 0,0404 | 7  |
| FBpp0111856 | DIHYDROPYRIDINE-SENSITIVE L-TYPE CALCIUM CHANNEL   | 0,0404 | 7  |
| FBpp0087438 | LOW DENSITY LIPOPROTEIN RECEPTOR                   | 0,0378 | 5  |
| FBpp0075730 | NEUREXIN IV                                        | 0,0361 | 7  |
| FBpp0075731 | Galactose-binding domain-like                      | 0,0356 | 8  |
| FBpp0075645 | PROTEIN TYROSINE PHOSPHATASE 69D, DROME            | 0,0299 | 22 |
| FBpp0079064 | MYOSIN                                             | 0,0287 | 5  |
| FBpp0070200 | Uncharacterized                                    | 0,0228 | 18 |

---
