# Supplementary material for: Diversity in Protein Glycosylation among Insect Species
Source: PubMed Central journal article supplement (PMC3044136; doi:10.1371/journal.pone.0016682), 2011-02-23
Supplement: pone.0016682.s008.pdf [file pone.0016682.s008.pdf]

**Table S5:** Annotation of the identified glycoproteins for *Acyrtosiphon pisum*. The list contains the accession number from Aphidbase, an abundance index (emPAI index) and the putative number of *N*-glycosylation sites.

| <b>Protein ID</b> | <b>Protein description</b>                          | <b>emPAI</b> | <b>putative <i>N</i>-glycosylation sites</b> |
|-------------------|-----------------------------------------------------|--------------|----------------------------------------------|
| ACYPI009769-PA    | GLYCERALDEHYDE 3-PHOSPHATE DEHYDROGENASE            | 3,6419       | 2                                            |
| ACYPI005249-PA    | UNCHARACTERIZED                                     | 2,8309       | 0                                            |
| ACYPI002286-PA    | AAA-FAMILY ATPASE                                   | 2,5286       | 2                                            |
| ACYPI000011-PA    | SERINE CARBOXYPEPTIDASE                             | 2,3404       | 5                                            |
| ACYPI008874-PA    | TUBULIN BETA CHAIN                                  | 2,3243       | 2                                            |
| ACYPI47197-PA     | CHAPERONIN                                          | 2,1623       | 0                                            |
| ACYPI004403-PA    | AMINOPEPTIDASE N-RELATED                            | 1,4848       | 6                                            |
| ACYPI001736-PA    | UNCHARACTERIZED                                     | 1,4712       | 5                                            |
| ACYPI23515-PA     | LEUCINE-RICH TRANSMEMBRANE PROTEINS                 | 1,2537       | 5                                            |
| ACYPI000064-PA    | ACTIN                                               | 1,2387       | 1                                            |
| ACYPI34982-PA     | LEUCINE-RICH TRANSMEMBRANE PROTEINS                 | 1,2387       | 5                                            |
| ACYPI000071-PA    | 40S RIBOSOMAL PROTEIN S15                           | 1,1543       | 0                                            |
| ACYPI008976-PA    | ACID PHOSPHATASE-1                                  | 1,1543       | 5                                            |
| ACYPI48450-PA     | LEUCINE-RICH TRANSMEMBRANE PROTEIN                  | 1,1543       | 3                                            |
| ACYPI004741-PA    | GLUCOSE DEHYDROGENASE                               | 1,0431       | 2                                            |
| ACYPI004906-PA    | LEUCINE-RICH TRANSMEMBRANE PROTEIN                  | 1,0091       | 8                                            |
| ACYPI001302-PA    | ALPHA-GALACTOSIDASE/ALPHA-N-ACETYLGALACTOSAMINIDASE | 0,9055       | 6                                            |
| ACYPI008776-PA    | CLATHRIN HEAVY CHAIN                                | 0,878        | 7                                            |
| ACYPI009513-PA    | ALPHA-GALACTOSIDASE/ALPHA-N-ACETYLGALACTOSAMINIDASE | 0,8587       | 3                                            |
| ACYPI006238-PA    | EUKARYOTIC TRANSLATION INITIATION FACTOR 3F, EIF3F  | 0,848        | 1                                            |
| ACYPI001776-PA    | LAMININ                                             | 0,8382       | 9                                            |
| ACYPI003702-PA    | PROCOLLAGEN/CELL ADHESION MOLECULE RELATED          | 0,8022       | 4                                            |
| ACYPI001315-PA    | CELL ADHESION MOLECULE                              | 0,7783       | 6                                            |
| ACYPI001436-PA    | ALPHA-AMYLASE                                       | 0,7783       | 3                                            |
| ACYPI002010-PA    | HEAT SHOCK PROTEIN 90                               | 0,7783       | 4                                            |
| ACYPI003547-PA    | MACROPHAGE MIGRATION INHIBITORY FACTOR RELATED      | 0,7783       | 1                                            |
| ACYPI004434-PA    | ELONGATION FACTOR 1-ALPHA                           | 0,7783       | 1                                            |

|                |                                                             |        |    |
|----------------|-------------------------------------------------------------|--------|----|
| ACYPI006035-PA | ACTIN                                                       | 0,7783 | 0  |
| ACYPI008325-PA | 40S RIBOSOMAL PROTEIN S2                                    | 0,7783 | 0  |
| ACYPI009454-PA | 40S RIBOSOMAL PROTEIN S24                                   | 0,7783 | 1  |
| ACYPI007079-PA | PROLYL 4-HYDROXYLASE ALPHA SUBUNIT                          | 0,7474 | 4  |
| ACYPI23892-PA  | VITELLOGENIN-RELATED                                        | 0,7342 | 8  |
| ACYPI000580-PA | NEPRILYSIN                                                  | 0,7084 | 6  |
| ACYPI001461-PA | GLUTAMINE SYNTHETASE                                        | 0,7014 | 2  |
| ACYPI004676-PA | GALACTOSE-SPECIFIC C-TYPE LECTIN                            | 0,7014 | 0  |
| ACYPI21131-PA  | LEUCINE-RICH TRANSMEMBRANE PROTEIN                          | 0,7014 | 6  |
| ACYPI32283-PA  | LEUCINE-RICH TRANSMEMBRANE PROTEIN                          | 0,668  | 3  |
| ACYPI002483-PA | EUKARYOTIC INITIATION FACTOR 4A                             | 0,6497 | 2  |
| ACYPI008065-PA | FATTY ACID SYNTHASE                                         | 0,6237 | 6  |
| ACYPI008926-PA | PROTEIN DISULFIDE ISOMERASE                                 | 0,6237 | 0  |
| ACYPI000091-PA | 40S RIBOSOMAL PROTEIN S26                                   | 0,5849 | 1  |
| ACYPI000918-PA | LYSOSOMAL ALPHA-MANNOSIDASE                                 | 0,5849 | 7  |
| ACYPI001447-PA | CARBOXYLESTERASE                                            | 0,5849 | 3  |
| ACYPI003079-PA | DEOXYRIBONUCLEASE II                                        | 0,5849 | 3  |
| ACYPI008181-PA | 60S RIBOSOMAL PROTEIN L17                                   | 0,5849 | 0  |
| ACYPI30377-PA  | LEUCINE-RICH TRANSMEMBRANE PROTEINS                         | 0,5849 | 1  |
| ACYPI000371-PA | LYSOSOMAL ALPHA-MANNOSIDASE                                 | 0,5707 | 11 |
| ACYPI007662-PA | LAMININ                                                     | 0,5631 | 11 |
| ACYPI55286-PA  | LAMININ                                                     | 0,557  | 7  |
| ACYPI000731-PA | LEUCINE-RICH TRANSMEMBRANE PROTEINS                         | 0,546  | 9  |
| ACYPI000023-PA | EUKARYOTIC TRANSLATION INITIATION FACTOR 3 SUBUNIT 11       | 0,5198 | 0  |
| ACYPI001013-PA | C-type lectin-like                                          | 0,5198 | 2  |
| ACYPI009480-PA | ORNITHINE AMINOTRANSFERASE                                  | 0,5198 | 2  |
| ACYPI003061-PA | YELLOW PROTEIN-RELATED                                      | 0,4925 | 3  |
| ACYPI000039-PA | 60S RIBOSOMAL PROTEIN L30                                   | 0,4679 | 1  |
| ACYPI000040-PA | 60S ACIDIC RIBOSOMAL PROTEIN P2                             | 0,4679 | 1  |
| ACYPI001221-PA | UDP-N-ACETYLGLUCOSAMINE--PEPTIDE N-ACETYLGLUCOSAMINYLTRANSF | 0,4679 | 2  |
| ACYPI004925-PA | ALPHA-GALACTOSIDASE/ALPHA-N-ACETYLGLACTOSAMINIDASE          | 0,4679 | 4  |

|                |                                                |        |    |
|----------------|------------------------------------------------|--------|----|
| ACYPI006593-PA | LOW DENSITY LIPOPROTEIN RECEPTOR               | 0,4679 | 5  |
| ACYPI001790-PA | SERINE PROTEASE INHIBITOR, SERPIN              | 0,4454 | 12 |
| ACYPI004819-PA | PROTEASE S28 PRO-X CARBOXYPEPTIDASE-RELATED    | 0,4454 | 6  |
| ACYPI006716-PA | PROLYLCARBOXYPEPTIDASE                         | 0,425  | 6  |
| ACYPI002758-PA | SERINE/THREONINE PROTEIN PHOSPHATASE           | 0,4031 | 1  |
| ACYPI000031-PA | 40S RIBOSOMAL PROTEIN S12                      | 0,3896 | 2  |
| ACYPI002182-PA | HISTONE H2B                                    | 0,3896 | 0  |
| ACYPI008145-PA | PROTEASE FAMILY C26 GAMMA-GLUTAMYL HYDROLASE   | 0,3896 | 3  |
| ACYPI009342-PA | GLYCOGEN DEBRANCHING ENZYME                    | 0,3896 | 0  |
| ACYPI010127-PA | 40S RIBOSOMAL PROTEIN S3A                      | 0,3896 | 1  |
| ACYPI49697-PA  | UNCHARACTERIZED                                | 0,3896 | 3  |
| ACYPI003972-PA | PROTEASE S28 PRO-X CARBOXYPEPTIDASE-RELATED    | 0,3737 | 4  |
| ACYPI002298-PA | TREHALASE                                      | 0,3593 | 4  |
| ACYPI004314-PA | 26S PROTEASOME NON-ATPASE REGULATORY SUBUNIT 8 | 0,3593 | 2  |
| ACYPI000016-PA | HSP40, SUBFAMILY A, MEMBERS 1,2,4              | 0,3335 | 0  |
| ACYPI000292-PA | LEUCINE-RICH TRANSMEMBRANE PROTEINS            | 0,3335 | 4  |
| ACYPI006346-PA | UNCHARACTERIZED                                | 0,3335 | 0  |
| ACYPI006761-PA | TUBULIN ALPHA CHAIN                            | 0,3335 | 1  |
| ACYPI009718-PA | 26S PROTESOME SUBUNIT 6                        | 0,3335 | 0  |
| ACYPI010073-PA | TUBULIN ALPHA CHAIN                            | 0,3335 | 1  |
| ACYPI49696-PA  | UNCHARACTERIZED                                | 0,3183 | 1  |
| ACYPI000012-PA | CATHEPSIN B                                    | 0,311  | 2  |
| ACYPI000432-PA | OXIDASE/PEROXIDASE                             | 0,311  | 7  |
| ACYPI000001-PA | PROTEASE M1 ZINC METALLOPROTEASE               | 0,2978 | 14 |
| ACYPI008675-PA | METALLOPROTEASE                                | 0,2978 | 3  |
| ACYPI000058-PA | COFILIN-RELATED                                | 0,2915 | 1  |
| ACYPI002498-PA | AMINOPEPTIDASE N-RELATED                       | 0,2915 | 1  |
| ACYPI002553-PA | 40S RIBOSOMAL PROTEIN S10                      | 0,2915 | 0  |
| ACYPI003298-PA | 40S RIBOSOMAL PROTEIN S6                       | 0,2915 | 2  |
| ACYPI008080-PA | TCTPROTEIN                                     | 0,2915 | 1  |
| ACYPI003145-PA | CARBOXYLESTERASE                               | 0,2826 | 4  |

|                |                                                              |        |    |
|----------------|--------------------------------------------------------------|--------|----|
| ACYPI000061-PA | ATP SYNTHASE BETA SUBUNIT                                    | 0,2688 | 0  |
| ACYPI009732-PA | BETA-GALACTOSIDASE RELATED                                   | 0,2688 | 9  |
| ACYPI003206-PA | EGF-LIKE DOMAIN PROTEIN                                      | 0,2607 | 23 |
| ACYPI000002-PA | ALPHA-AMYLASE                                                | 0,2589 | 3  |
| ACYPI001928-PA | UNCHARACTERIZED                                              | 0,2589 | 3  |
| ACYPI002881-PA | ALPHA-GALACTOSIDASE/ALPHA-N-ACETYLGALACTOSAMINIDASE          | 0,2589 | 3  |
| ACYPI006264-PA | BETA-GALACTOSIDASE                                           | 0,2589 | 3  |
| ACYPI009816-PA | 26S PROTEASOME REGULATORY SUBUNIT S3                         | 0,2589 | 1  |
| ACYPI009856-PA | RIBOSOMAL PROTEIN S9                                         | 0,2589 | 0  |
| ACYPI010019-PA | LAMININ                                                      | 0,2589 | 11 |
| ACYPI30879-PA  | LEUCINE-RICH TRANSMEMBRANE PROTEIN                           | 0,2589 | 10 |
| ACYPI48447-PA  | LEUCINE-RICH TRANSMEMBRANE PROTEIN                           | 0,2589 | 7  |
| ACYPI008178-PA | MYOSIN                                                       | 0,2511 | 8  |
| ACYPI003807-PA | SERINE PROTEASE-RELATED                                      | 0,2451 | 2  |
| ACYPI007027-PA | FRUCTOSE-BISPHOSPHATE ALDOLASE                               | 0,2451 | 0  |
| ACYPI004352-PA | BETA-HEXOSAMINIDASE                                          | 0,2411 | 5  |
| ACYPI009980-PA | BETA-HEXOSAMINIDASE                                          | 0,2411 | 6  |
| ACYPI000081-PA | 40S RIBOSOMAL PROTEIN S18                                    | 0,2328 | 0  |
| ACYPI002457-PA | LEUCINE-RICH TRANSMEMBRANE PROTEIN                           | 0,2328 | 3  |
| ACYPI002825-PA | VON WILLEBRAND FACTOR, TYPE A DOMAIN CONTAINING              | 0,2328 | 8  |
| ACYPI004023-PA | MITOCHONDRIAL CARRIER PROTEIN                                | 0,2328 | 1  |
| ACYPI006814-PA | UNCHARACTERIZED                                              | 0,2218 | 7  |
| ACYPI008897-PA | SERINE PROTEASE INHIBITOR, SERPIN                            | 0,2218 | 3  |
| ACYPI004271-PA | RIBOSOMAL PROTEIN S2                                         | 0,2114 | 1  |
| ACYPI007447-PA | Galactose-binding domain-like                                | 0,2114 | 3  |
| ACYPI008041-PA | PROCOLLAGEN/CELL ADHESION MOLECULE RELATED                   | 0,2114 | 0  |
| ACYPI009057-PA | TUBULIN                                                      | 0,2114 | 1  |
| ACYPI008184-PA | CELL ADHESION MOLECULE                                       | 0,2078 | 9  |
| ACYPI002661-PA | EUKARYOTIC TRANSLATION INITIATION FACTOR 3 SUBUNIT 6-RELATED | 0,2023 | 2  |
| ACYPI004360-PA | INOSINE-5-MONOPHOSPHATE DEHYDROGENASE                        | 0,2023 | 1  |
| ACYPI000969-PA | TROPOMYOSIN                                                  | 0,1937 | 1  |

|                |                                                     |        |    |
|----------------|-----------------------------------------------------|--------|----|
| ACYPI002402-PA | ALPHA-GALACTOSIDASE/ALPHA-N-ACETYLGALACTOSAMINIDASE | 0,1937 | 3  |
| ACYPI002662-PA | TRANSKETOLASE                                       | 0,1937 | 1  |
| ACYPI007003-PA | CREG1 PROTEIN                                       | 0,1937 | 1  |
| ACYPI007933-PA | UNCHARACTERIZED                                     | 0,1937 | 2  |
| ACYPI009967-PA | UNCHARACTERIZED                                     | 0,1937 | 4  |
| ACYPI004258-PA | FATTY ACID SYNTHASE                                 | 0,1918 | 8  |
| ACYPI000088-PA | L-XYLULOSE REDUCTASE                                | 0,1787 | 2  |
| ACYPI001648-PA | FAMILY NOT NAMED                                    | 0,1787 | 1  |
| ACYPI003593-PA | RIBOSOMAL PROTEIN L5                                | 0,1787 | 0  |
| ACYPI004024-PA | RAS-RELATED GTPASE                                  | 0,1787 | 0  |
| ACYPI005092-PA | 60S RIBOSOMAL PROTEIN L6                            | 0,1787 | 0  |
| ACYPI010069-PA | UNCHARACTERIZED                                     | 0,1787 | 2  |
| ACYPI000588-PA | CHAPERONIN                                          | 0,1722 | 1  |
| ACYPI000079-PA | 60S ACIDIC RIBOSOMAL PROTEIN FAMILY MEMBER          | 0,166  | 1  |
| ACYPI000189-PA | JHBP                                                | 0,166  | 4  |
| ACYPI000257-PA | CHAPERONIN                                          | 0,166  | 3  |
| ACYPI001186-PA | 26S PROTEASOME REGULATORY ATPASE SUBUNIT            | 0,166  | 0  |
| ACYPI002133-PA | 26S PROTEASOME NON-ATPASE REGULATORY SUBUNIT 4      | 0,166  | 0  |
| ACYPI002440-PA | PROTEASE FAMILY C26 GAMMA-GLUTAMYL HYDROLASE        | 0,166  | 5  |
| ACYPI007515-PA | EXTRACELLULAR MATRIX GLYCOPROTEIN RELATED           | 0,166  | 5  |
| ACYPI005230-PA | PROTEASE T2 ASPARAGINASE                            | 0,1548 | 1  |
| ACYPI005376-PA | SECRETED GLUCOSIDASE-RELATED                        | 0,1548 | 1  |
| ACYPI008059-PA | ALPHA-GLUCOSIDASE                                   | 0,1548 | 7  |
| ACYPI007706-PA | CHAPERONIN                                          | 0,1497 | 2  |
| ACYPI000100-PA | 30S/40S RIBOSOMAL PROTEIN S4                        | 0,145  | 1  |
| ACYPI006239-PA | GLUTAMINE SYNTHETASE                                | 0,145  | 1  |
| ACYPI010112-PA | 26S PROTEASOME REGULATORY SUBUNIT                   | 0,145  | 2  |
| ACYPI006675-PA | PROTEASE M1 ZINC METALLOPROTEASE                    | 0,1421 | 7  |
| ACYPI005215-PA | L-ASPARAGINASE                                      | 0,1405 | 8  |
| ACYPI002536-PA | CADHERIN                                            | 0,1345 | 12 |
| ACYPI009151-PA | CHAPERONIN                                          | 0,1327 | 1  |

|                |                                                             |        |    |
|----------------|-------------------------------------------------------------|--------|----|
| ACYPI004339-PA | EGF-LIKE DOMAIN PROTEIN                                     | 0,1314 | 10 |
| ACYPI005469-PA | ACETYL-COA ACETYLTRANSFERASE                                | 0,1288 | 1  |
| ACYPI007383-PA | BETA-HEXOSAMINIDASE                                         | 0,1288 | 2  |
| ACYPI007679-PA | 26S PROTEASOME REGULATORY SUBUNIT 7, PSD7                   | 0,1288 | 2  |
| ACYPI008920-PA | SERINE CARBOXYPEPTIDASE                                     | 0,1288 | 4  |
| ACYPI009633-PA | EUKARYOTIC TRANSLATION INITIATION FACTOR 3 SUBUNIT 3        | 0,1288 | 1  |
| ACYPI001732-PA | DENDRITIC CELL PROTEIN GA17                                 | 0,122  | 4  |
| ACYPI005498-PA | GLYPICAN                                                    | 0,122  | 1  |
| ACYPI33248-PA  | LEUCINE-RICH TRANSMEMBRANE PROTEINS                         | 0,122  | 6  |
| ACYPI000554-PA | CELL ADHESION MOLECULE                                      | 0,1105 | 6  |
| ACYPI000631-PA | CARBOXYLESTERASE                                            | 0,1105 | 3  |
| ACYPI007621-PA | UNCHARACTERIZED                                             | 0,1105 | 10 |
| ACYPI008775-PA | SERINE PROTEASE INHIBITOR, SERPIN                           | 0,1105 | 2  |
| ACYPI000180-PA | SERINE PROTEASE INHIBITOR, SERPIN                           | 0,1076 | 5  |
| ACYPI008996-PA | HEAT SHOCK PROTEIN 70KDA                                    | 0,1076 | 6  |
| ACYPI009915-PA | HEAT SHOCK PROTEIN 90                                       | 0,1076 | 2  |
| ACYPI000933-PA | 26S PROTEASOME SUBUNIT S9                                   | 0,1054 | 1  |
| ACYPI005134-PA | ACID PHOSPHATASE-RELATED                                    | 0,1054 | 5  |
| ACYPI006221-PA | LEUCINE-RICH TRANSMEMBRANE PROTEIN                          | 0,1054 | 7  |
| ACYPI000119-PA | PROTEIN DISULFIDE ISOMERASE                                 | 0,1008 | 1  |
| ACYPI001203-PA | AMINOPEPTIDASE N-RELATED                                    | 0,1008 | 12 |
| ACYPI001272-PA | NADP-SPECIFIC ISOCITRATE DEHYDROGENASE                      | 0,1008 | 1  |
| ACYPI001622-PA | COATOMER GAMMA SUBUNIT                                      | 0,1008 | 3  |
| ACYPI004825-PA | ANGIOPOIETIN 1 RECEPTOR                                     | 0,1008 | 7  |
| ACYPI006821-PA | 26S PROTEASE REGULATORY SUBUNIT 6B                          | 0,1008 | 1  |
| ACYPI010227-PA | PROTEASE FAMILY M28 PLASMA GLUTAMATE CARBOXYPEPTIDASE-RELAT | 0,1008 | 2  |
| ACYPI001125-PA | GLYCOGEN PHOSPHORYLASE                                      | 0,0985 | 5  |
| ACYPI003124-PA | DEAD BOX ATP-DEPENDENT RNA HELICASE                         | 0,0965 | 1  |
| ACYPI004078-PA | PROTEASOME REGULATORY SUBUNITS                              | 0,0965 | 2  |
| ACYPI009317-PA | LAMININ                                                     | 0,0932 | 11 |
| ACYPI003954-PA | CYSTEINE PROTEASE FAMILY C1-RELATED                         | 0,0927 | 4  |

|                |                                               |        |    |
|----------------|-----------------------------------------------|--------|----|
| ACYPI005091-PA | MULTICOPPER OXIDASE                           | 0,0857 | 2  |
| ACYPI007196-PA | RIBONUCLEASE T2                               | 0,0857 | 9  |
| ACYPI009744-PA | ALDEHYDE DEHYDROGENASE                        | 0,0857 | 1  |
| ACYPI005526-PA | CONTACTIN, INSECT                             | 0,0827 | 7  |
| ACYPI009772-PA | ALKALINE PHOSPHATASE                          | 0,0827 | 6  |
| ACYPI000669-PA | GLUCOSE DEHYDROGENASE                         | 0,0797 | 2  |
| ACYPI001686-PA | EUKARYOTIC TRANSLATION INITIATION FACTOR 3    | 0,0797 | 3  |
| ACYPI005866-PA | ALDEHYDE DEHYDROGENASE                        | 0,0797 | 2  |
| ACYPI000575-PA | CHAPERONIN                                    | 0,0772 | 2  |
| ACYPI005787-PA | NUCLEOLAR PROTEIN NOP56                       | 0,0772 | 6  |
| ACYPI005910-PA | EGF-LIKE DOMAIN PROTEIN                       | 0,0772 | 5  |
| ACYPI006024-PA | ALKALINE PHOSPHATASE                          | 0,0772 | 4  |
| ACYPI006138-PA | UBIQUITIN-ACTIVATING ENZYME E1                | 0,0772 | 3  |
| ACYPI000622-PA | ATP SYNTHASE                                  | 0,0747 | 2  |
| ACYPI005746-PA | VERY LONG-CHAIN ACYL-COA SYNTHETASE-RELATED   | 0,0723 | 2  |
| ACYPI007757-PA | CARBOXYLESTERASE                              | 0,0723 | 3  |
| ACYPI009755-PA | PROTEIN DISULFIDE ISOMERASE                   | 0,0723 | 0  |
| ACYPI000135-PA | LEUCINE-RICH TRANSMEMBRANE PROTEIN            | 0,07   | 9  |
| ACYPI000474-PA | HEAT SHOCK PROTEIN 70KDA                      | 0,0681 | 6  |
| ACYPI003478-PA | EXTRACELLULAR MATRIX GLYCOPROTEIN RELATED     | 0,0668 | 18 |
| ACYPI009052-PA | BETA-GALACTOSIDASE                            | 0,0641 | 3  |
| ACYPI49694-PA  | UNCHARACTERIZED                               | 0,0641 | 3  |
| ACYPI000145-PA | Terpenoid cyclases/Protein prenyltransferases | 0,0624 | 5  |
| ACYPI001244-PA | UNCHARACTERIZED                               | 0,0624 | 3  |
| ACYPI001940-PA | PHOSPHOFRUCTOKINASE                           | 0,0624 | 1  |
| ACYPI002583-PA | AMINOPEPTIDASE N-RELATED                      | 0,0624 | 7  |
| ACYPI002584-PA | ATP SYNTHASE                                  | 0,0624 | 4  |
| ACYPI007629-PA | PAN                                           | 0,0624 | 6  |
| ACYPI000928-PA | VON WILLEBRAND FACTOR                         | 0,0607 | 8  |
| ACYPI004887-PA | AMYLASE                                       | 0,0607 | 4  |
| ACYPI004414-PA | FAMILY NOT NAMED                              | 0,0593 | 1  |

|                |                                             |        |    |
|----------------|---------------------------------------------|--------|----|
| ACYPI006586-PA | DIPEPTIDYL-PEPTIDASE                        | 0,0593 | 3  |
| ACYPI006589-PA | 3-HYDROXYACYL-COA DEHYDROGENASE             | 0,0593 | 2  |
| ACYPI000923-PA | GLYCOGEN DEBRANCHING ENZYME                 | 0,0563 | 5  |
| ACYPI008370-PA | SERINE PROTEASE-RELATED                     | 0,0563 | 4  |
| ACYPI000405-PA | TREHALOSE-6-PHOSPHATE SYNTHASE              | 0,0551 | 4  |
| ACYPI002068-PA | LYSOSOMAL ALPHA-GLUCOSIDASE                 | 0,0537 | 14 |
| ACYPI008923-PA | EUKARYOTIC TRANSLATION ELONGATION FACTOR 2  | 0,0537 | 2  |
| ACYPI010100-PA | CALSYNTENIN                                 | 0,0524 | 6  |
| ACYPI000551-PA | 26S PROTEASOME REGULATORY SUBUNIT           | 0,0491 | 8  |
| ACYPI004006-PA | IMPORTIN (RAN-BINDING PROTEIN)              | 0,0491 | 3  |
| ACYPI002258-PA | PROTEASE M1 ZINC METALLOPROTEASE            | 0,0481 | 10 |
| ACYPI003481-PA | EUKARYOTIC TRANSLATION INITIATION FACTOR 3  | 0,0452 | 5  |
| ACYPI009925-PA | EBNA2 BINDING PROTEIN P100                  | 0,0452 | 5  |
| ACYPI000734-PA | GLUTAMYL AMINOPEPTIDASE                     | 0,0445 | 5  |
| ACYPI002950-PA | 26S PROTEASOME REGULATORY SUBUNIT           | 0,0445 | 5  |
| ACYPI008056-PA | COATOMER BETA SUBUNIT                       | 0,0435 | 5  |
| ACYPI000303-PA | GLUTAMATE SYNTHASE                          | 0,0411 | 5  |
| ACYPI001659-PA | ZINC FINGER PROTEIN                         | 0,0411 | 12 |
| ACYPI003244-PA | Kunitz_BPTI                                 | 0,0402 | 14 |
| ACYPI000667-PA | ALPHA-ACTININ                               | 0,0392 | 0  |
| ACYPI005729-PA | ACETYL-COA CARBOXYLASE                      | 0,0373 | 10 |
| ACYPI005219-PA | LEUCYL-TRNA SYNTHETASE                      | 0,0349 | 4  |
| ACYPI007409-PA | COATOMER ALPHA SUBUNIT                      | 0,032  | 8  |
| ACYPI002575-PA | PENTATRICOPEPTIDE REPEAT-CONTAINING PROTEIN | 0,0271 | 12 |
| ACYPI003639-PA | FnI-like domain                             | 0,0268 | 14 |
| ACYPI004766-PA | CARBAMOYLTRANSFERASE RELATED                | 0,0198 | 7  |
| ACYPI007519-PA | HELICASE SKI2W                              | 0,0198 | 9  |
| ACYPI007298-PA | FATTY ACID SYNTHASE                         | 0,0188 | 8  |
| ACYPI001668-PA | SPECTRIN BETA CHAIN                         | 0,0181 | 5  |
| ACYPI004133-PA | SPECTRIN ALPHA CHAIN                        | 0,0148 | 5  |
| ACYPI002581-PA | DYNEIN HEAVY CHAIN                          | 0,0139 | 16 |
