# Supplementary material for: Diversity in Protein Glycosylation among Insect Species
Source: PubMed Central journal article supplement (PMC3044136; doi:10.1371/journal.pone.0016682), 2011-02-23
Supplement: pone.0016682.s009.pdf [file pone.0016682.s009.pdf]

**Table S6:** Comparative analysis of the number of annotated glycoproteins according to protein description for *T. castaneum*, *B. mori*, *A. mellifera*, *D. melanogaster* and *A. pisum*.

|    | <b>Protein description</b>                                  | <b><i>A. pisum</i></b> | <b><i>D. melanogaster</i></b> | <b><i>A. mellifera</i></b> | <b><i>B. mori</i></b> | <b><i>T. castaneum</i></b> |
|----|-------------------------------------------------------------|------------------------|-------------------------------|----------------------------|-----------------------|----------------------------|
| 1  | 14-3-3 protein                                              | 0                      | 0                             | 1                          | 0                     | 1                          |
| 2  | 15-HYDROXYPROSTAGLANDIN DEHYDROGENASE                       | 0                      | 0                             | 0                          | 0                     | 1                          |
| 3  | 2-OXOGLUTARATE DEHYDROGENASE                                | 0                      | 1                             | 1                          | 0                     | 1                          |
| 4  | 3-HYDROXYACYL-COA DEHYDROGENASE                             | 1                      | 1                             | 1                          | 0                     | 1                          |
| 5  | 4-HYDROXYPHENYLPYRUVATE DIOXYGENASE                         | 0                      | 0                             | 0                          | 0                     | 1                          |
| 6  | AAA-FAMILY ATPASE                                           | 1                      | 0                             | 0                          | 0                     | 0                          |
| 7  | ACETYLCHOLINESTERASE                                        | 0                      | 1                             | 0                          | 0                     | 0                          |
| 8  | ACETYL-COA C-ACYLTRANSFERASE                                | 1                      | 0                             | 1                          | 0                     | 1                          |
| 9  | ACETYL-COA CARBOXYLASE                                      | 1                      | 0                             | 0                          | 0                     | 0                          |
| 10 | ACID PHOSPHATASE                                            | 2                      | 1                             | 0                          | 0                     | 0                          |
| 11 | ACONITASE                                                   | 0                      | 0                             | 1                          | 0                     | 1                          |
| 12 | ACTIN                                                       | 2                      | 1                             | 2                          | 2                     | 1                          |
| 13 | ACYL-COA DEHYDROGENASE                                      | 0                      | 0                             | 0                          | 0                     | 1                          |
| 14 | ADENOSINE DEAMINASE                                         | 0                      | 0                             | 0                          | 0                     | 1                          |
| 15 | ADP-RIBOSYLATION FACTOR, ARF                                | 0                      | 0                             | 1                          | 0                     | 0                          |
| 16 | ALANINE AMINOTRANSFERASE                                    | 0                      | 0                             | 1                          | 0                     | 1                          |
| 17 | ALCOHOL DEHYDROGENASE RELATED                               | 0                      | 0                             | 1                          | 0                     | 0                          |
| 18 | ALDEHYDE DEHYDROGENASE                                      | 2                      | 1                             | 0                          | 0                     | 2                          |
| 19 | ALDO-KETO REDUCTASE                                         | 0                      | 0                             | 0                          | 1                     | 0                          |
| 20 | ALKALINE PHOSPHATASE                                        | 2                      | 0                             | 0                          | 0                     | 0                          |
| 21 | ALPHA,ALPHA-TREHALASE                                       | 0                      | 0                             | 1                          | 1                     | 0                          |
| 22 | ALPHA-ACTININ                                               | 1                      | 0                             | 0                          | 0                     | 1                          |
| 23 | ALPHA-AMYLASE                                               | 3                      | 0                             | 1                          | 1                     | 2                          |
| 24 | ALPHA-GALACTOSIDASE/ALPHA-N-ACETYLGALACTOSAMINIDASE         | 5                      | 1                             | 0                          | 0                     | 1                          |
| 25 | ALPHA-GLUCOSIDASE                                           | 2                      | 0                             | 0                          | 0                     | 0                          |
| 26 | ALPHA-L-FUCOSIDASE                                          | 0                      | 1                             | 0                          | 0                     | 1                          |
| 27 | ALPHA-MANNOSIDASE                                           | 4                      | 2                             | 0                          | 0                     | 1                          |
| 28 | AMINOPEPTIDASE                                              | 4                      | 5                             | 1                          | 1                     | 1                          |
| 29 | ANGIOPOIETIN 1 RECEPTOR                                     | 1                      | 0                             | 0                          | 0                     | 0                          |
| 30 | ANGIOTENSIN-CONVERTING ENZYME (DIPEPTIDYL CARBOXYPEPTIDASE) | 0                      | 2                             | 0                          | 1                     | 1                          |
| 31 | APOLIPOPHORIN-III                                           | 0                      | 0                             | 0                          | 1                     | 1                          |
| 32 | ARGININE KINASE                                             | 0                      | 1                             | 1                          | 0                     | 1                          |
| 33 | ARYLSULFATASE B                                             | 0                      | 0                             | 0                          | 0                     | 1                          |
| 34 | ASPARTATE AMINOTRANSFERASE                                  | 0                      | 1                             | 0                          | 0                     | 0                          |
| 35 | ASPARTATE AMMONIA LYASE                                     | 0                      | 0                             | 1                          | 1                     | 1                          |
| 36 | ATP SYNTHASE SUBUNIT                                        | 4                      | 2                             | 4                          | 1                     | 4                          |
| 37 | ATP-CITRATE SYNTHASE                                        | 0                      | 0                             | 1                          | 0                     | 0                          |
| 38 | BETA-GALACTOSIDASE                                          | 2                      | 1                             | 0                          | 0                     | 0                          |
| 39 | BETA-GALACTOSIDASE RELATED                                  | 1                      | 0                             | 0                          | 0                     | 1                          |

|    |                                                                            |   |   |   |   |   |
|----|----------------------------------------------------------------------------|---|---|---|---|---|
| 40 | BETA-HEXOSAMINIDASE                                                        | 3 | 1 | 2 | 0 | 1 |
| 41 | BETA-MANNOSIDASE                                                           | 0 | 1 | 0 | 0 | 0 |
| 42 | BPTI_KUNITZ_2                                                              | 1 | 1 | 0 | 0 | 0 |
| 43 | CADHERIN                                                                   | 1 | 0 | 1 | 0 | 1 |
| 44 | CALPONIN/TRANSGELIN                                                        | 0 | 0 | 0 | 1 | 0 |
| 45 | CALSYNTENIN                                                                | 1 | 0 | 0 | 0 | 0 |
| 46 | CARBAMOYLTRANSFERASE                                                       | 1 | 0 | 0 | 0 | 0 |
| 47 | CARBOXYLESTERASE                                                           | 4 | 1 | 0 | 1 | 1 |
| 48 | CATALASE                                                                   | 0 | 0 | 0 | 0 | 2 |
| 49 | CATHEPSIN                                                                  | 1 | 0 | 1 | 0 | 1 |
| 50 | CATION-TRANSPORTING ATPASE                                                 | 0 | 0 | 2 | 0 | 0 |
| 51 | CDP-DIACYLGLYCEROL--GLYCEROL-3-PHOSPHATE 3-PHOSPHATIDYLTRANSFERASE-RELATED | 0 | 0 | 1 | 0 | 0 |
| 52 | CELL ADHESION MOLECULE                                                     | 3 | 2 | 0 | 0 | 0 |
| 53 | CHAOPTIN                                                                   | 0 | 1 | 0 | 0 | 1 |
| 54 | CHAPERONIN                                                                 | 6 | 0 | 2 | 0 | 0 |
| 55 | CITRATE SYNTHASE                                                           | 0 | 0 | 1 | 0 | 1 |
| 56 | CLATHRIN                                                                   | 1 | 1 | 0 | 0 | 0 |
| 57 | COATOMER ALPHA SUBUNIT                                                     | 3 | 0 | 0 | 0 | 0 |
| 58 | COFILIN-RELATED                                                            | 1 | 0 | 0 | 0 | 0 |
| 59 | COLLAGEN ALPHA CHAIN                                                       | 0 | 0 | 0 | 0 | 1 |
| 60 | CONTACTIN                                                                  | 1 | 1 | 1 | 0 | 1 |
| 61 | CREATINASE                                                                 | 0 | 1 | 0 | 0 | 0 |
| 62 | CREG1 PROTEIN                                                              | 1 | 0 | 0 | 0 | 1 |
| 63 | CRUMBS-RELATED                                                             | 0 | 1 | 0 | 0 | 0 |
| 64 | Crustacean CHH/MIH/GIH neurohormone                                        | 0 | 1 | 0 | 0 | 0 |
| 65 | C-TYPE LECTIN DOMAIN CONTAINING PROTEIN                                    | 1 | 4 | 0 | 0 | 0 |
| 66 | CYSTEINE PROTEASE FAMILY C1-RELATED                                        | 1 | 1 | 0 | 0 | 0 |
| 67 | CYSTEINE-RICH SECRETORY PROTEIN (CRISP/SCP/TPX1)-RELATED                   | 0 | 1 | 0 | 0 | 0 |
| 68 | CYTOCHROME C OXIDASE                                                       | 0 | 0 | 0 | 0 | 1 |
| 69 | CYTOCHROME P450 SUBFAMILY 4G                                               | 0 | 0 | 1 | 0 | 0 |
| 70 | DEAD-BOX PROTEIN                                                           | 1 | 0 | 0 | 0 | 0 |
| 71 | DEHYDRODOLICHYL DIPHOSPHATE SYNTHASE                                       | 0 | 0 | 0 | 1 | 0 |
| 72 | DENDRITIC CELL PROTEIN GA17                                                | 1 | 0 | 0 | 0 | 0 |
| 73 | DEOXYRIBONUCLEASE II                                                       | 1 | 0 | 0 | 0 | 0 |
| 74 | DIHYDROLIPOAMIDE ACETYL/SUCCINYL-TRANSFERASE-RELATED                       | 0 | 0 | 0 | 0 | 1 |
| 75 | DIHYDROPYRIDINE-SENSITIVE L-TYPE CALCIUM CHANNEL                           | 0 | 1 | 1 | 0 | 0 |
| 76 | DIPEPTIDYL-PEPTIDASE                                                       | 1 | 0 | 0 | 0 | 0 |
| 77 | DISULFIDE OXIDOREDUCTASE                                                   | 0 | 0 | 0 | 1 | 0 |
| 78 | DOMON                                                                      | 0 | 1 | 0 | 0 | 0 |
| 79 | DUF3421                                                                    | 0 | 2 | 0 | 1 | 0 |
| 80 | DYNEIN HEAVY CHAIN                                                         | 1 | 0 | 0 | 0 | 0 |
| 81 | EBNA2 BINDING PROTEIN                                                      | 1 | 0 | 0 | 0 | 0 |
| 82 | EGF-LIKE DOMAIN PROTEIN                                                    | 3 | 1 | 0 | 0 | 0 |

|    |                                        |   |   |   |   |   |
|----|----------------------------------------|---|---|---|---|---|
| 83 | ELECTRON TRANSPORT OXIDOREDUCTASE      | 0 | 0 | 2 | 0 | 1 |
| 84 | ELONGATION FACTOR 1-ALPHA (EF-1-ALPHA) | 1 | 0 | 1 | 0 | 1 |
| 85 | ENOLASE                                | 0 | 0 | 0 | 1 | 0 |

|     |                                                              |   |   |   |   |   |
|-----|--------------------------------------------------------------|---|---|---|---|---|
| 86  | ENOLASE-PHOSPHATASE E-1                                      | 0 | 0 | 1 | 0 | 0 |
| 87  | ENOYL-COA HYDRATASE-RELATED                                  | 0 | 0 | 0 | 0 | 1 |
| 88  | EUKARYOTIC TRANSLATION INITIATION FACTOR                     | 8 | 0 | 1 | 0 | 0 |
| 89  | EXTRACELLULAR MATRIX GLYCOPROTEIN RELATED                    | 2 | 0 | 0 | 0 | 0 |
| 90  | FAD NADPH DEHYDROGENASE/OXIDOREDUCTASE                       | 1 | 0 | 0 | 0 | 0 |
| 91  | FASCICLIN I (FAS I)                                          | 0 | 0 | 0 | 0 | 1 |
| 92  | FASCICLIN II (FAS II)                                        | 0 | 0 | 1 | 0 | 1 |
| 93  | FATTY ACID SYNTHASE                                          | 3 | 0 | 0 | 0 | 0 |
| 94  | FERRITIN SUBUNIT 1                                           | 0 | 0 | 0 | 1 | 1 |
| 95  | FIBRINOGEN C                                                 | 0 | 1 | 0 | 0 | 0 |
| 96  | FIBRINOGEN-RELATED                                           | 0 | 1 | 0 | 0 | 0 |
| 97  | FIBRONECTIN TYPE III                                         | 0 | 5 | 0 | 0 | 0 |
| 98  | FNI-LIKE                                                     | 1 | 0 | 0 | 0 | 0 |
| 99  | FRUCTOSE-1,6-BISPHOSPHATASE-RELATED                          | 0 | 0 | 0 | 0 | 1 |
| 100 | FRUCTOSE-BISPHOSPHATE ALDOLASE                               | 1 | 0 | 0 | 0 | 1 |
| 101 | FUMARYLACETOACETATE HYDROLASE                                | 0 | 0 | 0 | 0 | 1 |
| 102 | GALACTOSE-SPECIFIC C-TYPE LECTIN                             | 2 | 2 | 0 | 0 | 0 |
| 103 | GLUCOSE DEHYDROGENASE                                        | 2 | 1 | 0 | 0 | 0 |
| 104 | GLUCOSE-6-PHOSPHATE ISOMERASE                                | 0 | 0 | 1 | 0 | 0 |
| 105 | GLUTAMATE CARBOXYPEPTIDASE                                   | 0 | 0 | 0 | 1 | 0 |
| 106 | GLUTAMATE DEHYDROGENASE                                      | 0 | 0 | 1 | 0 | 1 |
| 107 | GLUTAMATE SEMIALDEHYDE DEHYDROGENASE                         | 0 | 0 | 1 | 0 | 0 |
| 108 | GLUTAMINE SYNTHETASE                                         | 3 | 0 | 0 | 0 | 0 |
| 109 | GLUTAMYL AMINOPEPTIDASE                                      | 1 | 0 | 0 | 0 | 0 |
| 110 | GLUTATHIONE PEROXIDASE                                       | 0 | 0 | 1 | 0 | 0 |
| 111 | GLUTATHIONE S-TRANSFERASE                                    | 0 | 0 | 0 | 0 | 1 |
| 112 | GLYCERALDEHYDE 3-PHOSPHATE DEHYDROGENASE                     | 1 | 0 | 1 | 0 | 1 |
| 113 | GLYCEROL-3-PHOSPHATE DEHYDROGENASE                           | 0 | 0 | 2 | 0 | 0 |
| 114 | GLYCOGEN DEBRANCHING ENZYME                                  | 2 | 1 | 1 | 0 | 0 |
| 115 | GLYCOGEN PHOSPHORYLASE                                       | 1 | 0 | 1 | 1 | 1 |
| 116 | GLYCOGEN SYNTHASE                                            | 0 | 1 | 0 | 0 | 0 |
| 117 | GLYCOSIDE HYDROLASES                                         | 0 | 0 | 0 | 2 | 0 |
| 118 | GLYPICAN                                                     | 1 | 1 | 0 | 0 | 0 |
| 119 | GRAM-NEGATIVE BACTERIA BINDING PROTEIN 1                     | 0 | 0 | 0 | 1 | 0 |
| 120 | GTP-BINDING PROTEIN SAR1                                     | 0 | 0 | 1 | 0 | 0 |
| 121 | HEAT SHOCK PROTEIN                                           | 5 | 0 | 4 | 1 | 7 |
| 122 | HELICASE                                                     | 1 | 0 | 0 | 0 | 0 |
| 123 | HEPARAN N-SULFATASE                                          | 0 | 0 | 1 | 0 | 1 |
| 124 | HISTONE                                                      | 1 | 0 | 0 | 0 | 1 |
| 125 | HOMOGENTISATE 1,2-DIOXYGENASE                                | 0 | 0 | 0 | 0 | 1 |
| 126 | HOST CELL FACTOR-RELATED                                     | 0 | 0 | 0 | 1 | 0 |
| 127 | IMMUNOGLOBULIN DOMAIN SUPERFAMILY (SENSORY GUIDANCE PROTEIN) | 0 | 0 | 0 | 0 | 2 |

|     |                                                                      |    |   |   |   |   |
|-----|----------------------------------------------------------------------|----|---|---|---|---|
| 128 | IMPORTIN (RAN-BINDING PROTEIN)                                       | 1  | 0 | 0 | 0 | 0 |
| 129 | INORGANIC PYROPHOSPHATASE                                            | 0  | 0 | 0 | 0 | 1 |
| 130 | INOSINE-5-MONOPHOSPHATE DEHYDROGENASE                                | 1  | 0 | 0 | 0 | 0 |
| 131 | INS ALLERGEN RP                                                      | 0  | 1 | 0 | 0 | 0 |
| 132 | INSECT HEMOCYANIN-RELATED                                            | 0  | 1 | 2 | 2 | 6 |
| 133 | INTER-ALPHA-TRYPSIN INHIBITOR HEAVY CHAIN                            | 0  | 0 | 0 | 0 | 1 |
| 134 | ISOCITRATE DEHYDROGENASE                                             | 1  | 2 | 1 | 0 | 0 |
| 135 | JUVENILE HORMONE BINDING PROTEIN                                     | 1  | 0 | 0 | 1 | 0 |
| 136 | JUVENILE HORMONE ESTERASE                                            | 0  | 0 | 0 | 0 | 1 |
| 137 | KETOACID-COENZYME A TRANSFERASE                                      | 0  | 0 | 1 | 0 | 0 |
| 138 | LAMININ                                                              | 5  | 4 | 0 | 1 | 4 |
| 139 | L-ASPARAGINASE                                                       | 1  | 0 | 0 | 0 | 0 |
| 140 | LEUCINE AMINOPEPTIDASE                                               | 0  | 0 | 0 | 0 | 1 |
| 141 | LEUCINE-RICH TRANSMEMBRANE PROTEIN                                   | 15 | 1 | 0 | 0 | 4 |
| 142 | LEUCYL-TRNA SYNTHETASE                                               | 1  | 0 | 0 | 0 | 0 |
| 143 | LIPASE                                                               | 0  | 1 | 0 | 1 | 0 |
| 144 | LIPOPROTEIN                                                          | 0  | 2 | 0 | 3 | 0 |
| 145 | LONG-CHAIN-FATTY-ACID COA LIGASE                                     | 0  | 0 | 0 | 1 | 0 |
| 146 | LOW DENSITY LIPOPROTEIN RECEPTOR                                     | 1  | 1 | 1 | 0 | 2 |
| 147 | L-XYLULOSE REDUCTASE/LUNG CARBONYL REDUCTASE [NADPH]                 | 1  | 0 | 0 | 0 | 0 |
| 148 | LYSOSOMAL ACID LIPASE-RELATED                                        | 0  | 0 | 0 | 0 | 1 |
| 149 | MACROGLOBULIN/COMPLEMENT                                             | 0  | 2 | 1 | 0 | 0 |
| 150 | MACROPHAGE MIGRATION INHIBITORY FACTOR RELATED                       | 1  | 0 | 0 | 0 | 0 |
| 151 | MALATE AND LACTATE DEHYDROGENASE                                     | 0  | 0 | 1 | 0 | 0 |
| 152 | MALIC ENZYME                                                         | 0  | 0 | 0 | 0 | 2 |
| 153 | METALLOPROTEASE                                                      | 1  | 4 | 0 | 0 | 0 |
| 154 | MIDLINE FASCICLIN                                                    | 0  | 1 | 0 | 0 | 0 |
| 155 | MITOCHONDRIAL CARRIER PROTEIN                                        | 1  | 0 | 1 | 0 | 0 |
| 156 | MITOCHONDRIAL PROCESSING PEPTIDASE BETA SUBUNIT                      | 0  | 0 | 1 | 0 | 1 |
| 157 | MUCIN                                                                | 0  | 1 | 2 | 2 | 0 |
| 158 | MULTICOPPER OXIDASE                                                  | 1  | 0 | 0 | 0 | 1 |
| 159 | MULTIPLE INOSITOL POLYPHOSPHATE PHOSPHATASE                          | 0  | 0 | 0 | 0 | 1 |
| 160 | MYOSIN                                                               | 1  | 1 | 0 | 2 | 0 |
| 161 | NADH-UBIQUINONE OXIDOREDUCTASE                                       | 0  | 0 | 2 | 0 | 0 |
| 162 | NEPRILYSIN                                                           | 1  | 0 | 1 | 0 | 0 |
| 163 | NEUREXIN IV                                                          | 0  | 1 | 0 | 0 | 0 |
| 164 | NEUROTRACTING/LSAMP/NEUROTRIMIN/OBCAM RELATED CELL ADHESION MOLECULE | 0  | 0 | 0 | 0 | 1 |
| 165 | NICOTINATE PHOSPHORIBOSYLTRANSFERASE                                 | 0  | 1 | 0 | 0 | 0 |
| 166 | NITRIC OXIDE SYNTHASE                                                | 0  | 0 | 1 | 0 | 0 |
| 167 | NUCLEAR PROTEIN SKIP-RELATED                                         | 0  | 0 | 1 | 0 | 0 |
| 168 | NUCLEOLAR PROTEIN NOP56                                              | 1  | 0 | 0 | 0 | 0 |
| 169 | ORNITHINE AMINOTRANSFERASE                                           | 1  | 0 | 0 | 0 | 0 |

|     |                                                                        |    |    |    |   |    |
|-----|------------------------------------------------------------------------|----|----|----|---|----|
| 170 | OXIDASE/PEROXIDASE                                                     | 1  | 0  | 0  | 0 | 0  |
| 171 | PAPILIN                                                                | 1  | 0  | 0  | 0 | 0  |
| 172 | PENTATRICOPEPTIDE REPEAT-CONTAINING PROTEIN                            | 1  | 0  | 0  | 0 | 0  |
| 173 | PERIOSTIN-RELATED                                                      | 0  | 1  | 0  | 0 | 0  |
| 174 | PERIPLASMIC BINDING PROTEIN-LIKE II                                    | 0  | 0  | 0  | 0 | 1  |
| 175 | PEROXIREDOXIN                                                          | 0  | 0  | 1  | 1 | 1  |
| 176 | PHOSPHATIDYLCHOLINE-STEROL ACYLTRANSFERASE-RELATED                     | 0  | 0  | 1  | 0 | 0  |
| 177 | PHOSPHATIDYLINOSITOL TRANSFER PROTEIN/RETINAL DEGENERATION B PROTEIN   | 0  | 0  | 1  | 0 | 0  |
| 178 | PHOSPHOFRUCTOKINASE                                                    | 1  | 1  | 1  | 0 | 0  |
| 179 | PHOSPHOGLYCERATE KINASE                                                | 0  | 0  | 1  | 0 | 0  |
| 180 | PLASMA MEMBRANE CA-ATPASE B2                                           | 0  | 0  | 1  | 0 | 0  |
| 181 | PLC-like phosphodiesterases                                            | 0  | 1  | 0  | 0 | 0  |
| 182 | PROCOLLAGEN/CELL ADHESION MOLECULE RELATED                             | 2  | 0  | 0  | 0 | 1  |
| 183 | PROHIBITIN                                                             | 0  | 0  | 1  | 0 | 0  |
| 184 | PROLYL 4-HYDROXYLASE ALPHA SUBUNIT                                     | 1  | 0  | 0  | 0 | 0  |
| 185 | PROLYLCARBOXYPEPTIDASE/PRCP                                            | 1  | 1  | 0  | 0 | 0  |
| 186 | PROTEASE FAMILY C26 GAMMA-GLUTAMYL HYDROLASE                           | 2  | 0  | 0  | 0 | 0  |
| 187 | PROTEASE FAMILY M28 PLASMA GLUTAMATE CARBOXYPEPTIDASE-RELATED          | 1  | 0  | 0  | 0 | 1  |
| 188 | PROTEASE M1 ZINC METALLOPROTEASE                                       | 3  | 1  | 0  | 0 | 0  |
| 189 | PROTEASE REGULATORY SUBUNIT                                            | 10 | 1  | 0  | 0 | 0  |
| 190 | PROTEASE S28 PRO-X CARBOXYPEPTIDASE-RELATED                            | 2  | 1  | 0  | 0 | 1  |
| 191 | PROTEASE T2 ASPARAGINASE                                               | 2  | 0  | 0  | 0 | 0  |
| 192 | PROTEASOME SUBUNIT                                                     | 2  | 0  | 0  | 0 | 2  |
| 193 | PROTEIN DISULFIDE ISOMERASE                                            | 3  | 1  | 0  | 1 | 1  |
| 194 | Protein kinase-like (PK-like)                                          | 0  | 1  | 0  | 0 | 0  |
| 195 | PROTEIN TYROSINE PHOSPHATASE 69D, DROME                                | 0  | 1  | 0  | 0 | 0  |
| 196 | PTD012 PROTEIN                                                         | 0  | 0  | 0  | 1 | 0  |
| 197 | PURINE BIOSYNTHESIS PROTEIN 6, PUR6                                    | 0  | 0  | 0  | 0 | 1  |
| 198 | PUROMYCIN-SENSITIVE AMINOPEPTIDASE                                     | 0  | 0  | 1  | 0 | 0  |
| 199 | PUR-TRANSCRIPTIONAL ACTIVATOR                                          | 0  | 0  | 0  | 0 | 1  |
| 200 | PUSHOVER/RETINOBLASTOMA-ASSOCIATED FACTOR 600                          | 1  | 0  | 0  | 0 | 0  |
| 201 | PYRUVATE CARBOXYLASE                                                   | 0  | 0  | 1  | 0 | 0  |
| 202 | PYRUVATE DEHYDROGENASE                                                 | 0  | 0  | 2  | 0 | 0  |
| 203 | PYRUVATE DEHYDROGENASE E1 COMPONENT, BETA SUBUNIT                      | 0  | 0  | 0  | 0 | 1  |
| 204 | QUIESCIN Q6-RELATED SULFHYDRYL OXIDASE                                 | 0  | 0  | 0  | 0 | 1  |
| 205 | RECEPTOR FOR ACTIVATED PROTEIN KINASE C (RACK1)                        | 0  | 1  | 1  | 0 | 0  |
| 206 | RAS-RELATED GTPASE                                                     | 1  | 0  | 0  | 0 | 0  |
| 207 | RETICULON-RELATED                                                      | 0  | 1  | 0  | 0 | 0  |
| 208 | RETINOID-INDUCIBLE SERINE CARBOXYPEPTIDASE (SERINE CARBOXYPEPTIDASE 1) | 0  | 0  | 1  | 0 | 0  |
| 209 | REVERSE TRANSCRIPTASE                                                  | 0  | 0  | 0  | 0 | 1  |
| 210 | RIBONUCLEASE T2                                                        | 1  | 0  | 0  | 0 | 0  |
| 211 | RIBOPHORIN I                                                           | 0  | 0  | 1  | 0 | 0  |
| 212 | RIBOSOMAL PROTEINS                                                     | 18 | 14 | 10 | 5 | 22 |

|     |                                                                                  |    |    |   |   |    |
|-----|----------------------------------------------------------------------------------|----|----|---|---|----|
| 213 | RIBOSOME BIOGENESIS PROTEIN BRIX                                                 | 0  | 0  | 0 | 1 | 0  |
| 214 | RNA-BINDING PROTEIN                                                              | 0  | 1  | 0 | 0 | 0  |
| 215 | SARCALUMENIN                                                                     | 0  | 0  | 1 | 0 | 0  |
| 216 | SECRETED GLUCOSIDASE-RELATED                                                     | 1  | 0  | 0 | 0 | 0  |
| 217 | SECRETED SUGAR HYDROLASE                                                         | 0  | 0  | 1 | 0 | 0  |
| 218 | SEMAPHORIN                                                                       | 0  | 1  | 0 | 0 | 0  |
| 219 | SERINE CARBOXYPEPTIDASE                                                          | 2  | 1  | 0 | 0 | 1  |
| 220 | SERINE PROTEASE INHIBITOR, SERPIN                                                | 4  | 1  | 0 | 1 | 4  |
| 221 | SERINE PROTEASE-RELATED                                                          | 2  | 7  | 0 | 7 | 0  |
| 222 | SERINE/THREONINE PROTEIN PHOSPHATASE 2A REGULATORY SUBUNIT A                     | 1  | 1  | 0 | 0 | 0  |
| 223 | SHORT-CHAIN DEHYDROGENASE-RELATED                                                | 0  | 0  | 0 | 0 | 1  |
| 224 | SOLUTE CARRIER FAMILY 27 (FATTY ACID TRANSPORTER)                                | 0  | 0  | 1 | 0 | 0  |
| 225 | SPECTRIN ALPHA CHAIN                                                             | 1  | 0  | 0 | 0 | 0  |
| 226 | SPECTRIN BETA CHAIN                                                              | 1  | 0  | 1 | 0 | 0  |
| 227 | SPECTRIN-LIKE CELL STRUCTURE PROTEIN                                             | 0  | 0  | 1 | 0 | 0  |
| 228 | SPHINGOMYELIN PHOSPHODIESTERASE 1, 2                                             | 0  | 0  | 0 | 0 | 1  |
| 229 | SUCCINATE DEHYDROGENASE 2 FLAVOPROTEIN SUBUNIT                                   | 0  | 1  | 0 | 0 | 0  |
| 230 | SUCCINATE DEHYDROGENASE IRON-SULFUR PROTEIN                                      | 0  | 0  | 1 | 0 | 0  |
| 231 | SUCCINATE SEMIALDEHYDE DEHYDROGENASE                                             | 0  | 0  | 0 | 0 | 1  |
| 232 | SUCCINYL-COA SYNTHETASE BETA CHAIN                                               | 0  | 1  | 1 | 0 | 0  |
| 233 | SUCROSE-6-PHOSPHATE HYDROLASE                                                    | 0  | 0  | 0 | 1 | 0  |
| 234 | SUSHI DOMAIN CONTAINING PROTEIN                                                  | 0  | 0  | 0 | 0 | 1  |
| 235 | TBC1 DOMAIN FAMILY MEMBER GTPASE-ACTIVATING PROTEIN                              | 0  | 0  | 0 | 0 | 1  |
| 236 | TCTPROTEIN                                                                       | 1  | 0  | 0 | 0 | 0  |
| 237 | TERPENOID CYCLASES                                                               | 1  | 1  | 0 | 0 | 0  |
| 238 | THIOREDOXIN_2                                                                    | 0  | 1  | 0 | 0 | 0  |
| 239 | TRANSFERRIN                                                                      | 0  | 0  | 0 | 1 | 0  |
| 240 | TRANSKETOLASE                                                                    | 1  | 0  | 1 | 0 | 1  |
| 241 | TRANSMEMBRANE PROTEASE, SERINE 2                                                 | 0  | 0  | 1 | 0 | 0  |
| 242 | TREHALOSE                                                                        | 1  | 0  | 0 | 0 | 0  |
| 243 | TREHALOSE-6-PHOSPHATE SYNTHASE                                                   | 1  | 1  | 1 | 0 | 0  |
| 244 | TROPOMYOSIN                                                                      | 1  | 0  | 0 | 1 | 1  |
| 245 | TUBULIN                                                                          | 4  | 4  | 4 | 1 | 0  |
| 246 | UBIQUINOL-CYTOCHROME C REDUCTASE COMPLEX CORE PROTEIN 2                          | 0  | 0  | 0 | 0 | 1  |
| 247 | UBIQUITIN-ACTIVATING ENZYME E1                                                   | 1  | 0  | 0 | 0 | 0  |
| 248 | UBIQUITIN-CONJUGATING ENZYME E2                                                  | 0  | 0  | 1 | 0 | 0  |
| 249 | UDP-GLUCOSE GLYCOPROTEIN:GLUCOSYLTRANSFERASE                                     | 0  | 0  | 0 | 1 | 1  |
| 250 | UDP-N-ACETYLGLUCOSAMINE--PEPTIDE N-ACETYLGLUCOSAMINYLTRANSFERASE 110 KDA SUBUNIT | 1  | 0  | 0 | 0 | 0  |
| 251 | UDP-N-ACETYLGLUCOSAMINE PYROPHOSPHORYLASE 1                                      | 0  | 0  | 0 | 0 | 1  |
| 252 | UNCHARACTERIZED                                                                  | 15 | 10 | 3 | 2 | 10 |
| 253 | VERY LONG-CHAIN ACYL-COA SYNTHETASE-RELATED                                      | 1  | 0  | 0 | 0 | 0  |
| 254 | VITELLOGENIN-RELATED                                                             | 1  | 2  | 0 | 0 | 4  |

|     |                                                 |   |   |   |   |   |
|-----|-------------------------------------------------|---|---|---|---|---|
| 255 | VOLTAGE-DEPENDENT ANION-SELECTIVE CHANNEL       | 0 | 0 | 1 | 0 | 0 |
| 256 | VON WILLEBRAND FACTOR, TYPE A DOMAIN CONTAINING | 2 | 0 | 0 | 0 | 0 |
| 257 | V-TYPE ATP SYNTHASE ALPHA CHAIN                 | 0 | 0 | 2 | 1 | 1 |
| 258 | V-TYPE ATP SYNTHASE BETA CHAIN                  | 0 | 0 | 0 | 1 | 0 |
| 259 | YELLOW PROTEIN-RELATED                          | 1 | 0 | 0 | 0 | 0 |
| 260 | ZINC FINGER PROTEIN                             | 1 | 0 | 0 | 0 | 1 |
| 261 | ZN/RING FINGER PROTEIN 2                        | 0 | 1 | 0 | 0 | 0 |

---
