# Supplementary material for: Diversity in Protein Glycosylation among Insect Species
Source: PubMed Central journal article supplement (PMC3044136; doi:10.1371/journal.pone.0016682), 2011-02-23
Supplement: pone.0016682.s010.pdf [file pone.0016682.s010.pdf]

**Table S7:** WU-BLAST analysis to search for proteins homologous to O-mannosyltransferases from *Drosophila melanogaster* POMT1 (Genbank accession No NP\_524025.2) and POMT2 (Genbank accession No NP\_569858.1).

| <b>Accession number</b>    | <b>Insect species</b>          | <b>Annotation</b>                                     | <b>% Identity</b> | <b>% Similarity</b> |
|----------------------------|--------------------------------|-------------------------------------------------------|-------------------|---------------------|
| <b>Homologous to POMT1</b> |                                |                                                       |                   |                     |
| NP_524025.2                | <i>Drosophila melanogaster</i> | protein O-mannosyltransferase 1 (POMT1)               | 100               | 100                 |
| BGIBMGA003152              | <i>Bombyx mori</i>             | predicted: derived from silkbases cDNA database       | 69                | 83                  |
| XP_623815.2                | <i>Apis mellifera</i>          | predicted: similar to rotated abdomen                 | 55                | 71                  |
| XP_971065.1                | <i>Tribolium castaneum</i>     | predicted: similar to rotated abdomen                 | 54                | 71                  |
| XP_001949721.1             | <i>Acyrtosiphon pisum</i>      | predicted: similar to AGAP010784-PA                   | 52                | 70                  |
| <b>Homologous to POMT2</b> |                                |                                                       |                   |                     |
| NP_569858.1                | <i>Drosophila melanogaster</i> | protein O-mannosyltransferase 2 (POMT2)               | 100               | 100                 |
| BGIBMGA005070              | <i>Bombyx mori</i>             | predicted: derived from silkbases cDNA database       | 66                | 78                  |
| XP_973439.1                | <i>Tribolium castaneum</i>     | predicted: similar to protein mannosyltransferase     | 63                | 75                  |
| XP_623973.1                | <i>Apis mellifera</i>          | predicted: similar to protein O-mannosyltransferase 2 | 62                | 75                  |
| XP_001946715.1             | <i>Acyrtosiphon pisum</i>      | predicted: similar to mannosyltransferase             | 55                | 70                  |
